# Supplementary material for: Microwave-assisted catalyst-free multicomponent one-pot green synthesis of highly functionalized aminocyanopyridines and (4-hydroxy)quinolines in aqueous medium and its in silico studies
Source: Royal Society of Chemistry journal article supplement (doi:10.1039/d2nj03933h), 2022-01-01
Supplement: d2nj03933h1.pdf [file d2nj03933h1.pdf]

## Supporting Information

# Microwave-assisted Catalyst-free Multicomponent One-Pot Green synthesis of highly functionalized Aminocyanopyridines and Dihydroquinolines in aqua medium and its In-Silico Studies

Loveneesh Kumar<sup>a</sup>, Nishant Verma<sup>a</sup>, Neeraj Kumar<sup>a,d</sup>, Hitesh Sehrawat<sup>a</sup>, Rupesh Kumar<sup>a,e</sup>,  
Ramesh Chandra<sup>a,b,c,\*</sup>

a. Drug Discovery & Development Laboratory, Department of Chemistry, University of Delhi, Delhi 110007, India.

b. Dr. B. R. Ambedkar, Centre for Biomedical Research, University of Delhi, Delhi 110007, India.

c. Institute of Nano Medical Sciences (INMS), University of Delhi, Delhi 110007, India.

d. Department of Neurology, Northwestern University, Feinberg School of Medicine, Chicago, IL 60611, USA

e. Department of Chemistry, Kirori Mal College, University of Delhi, Delhi 110007, India.

### General Information

Unless otherwise noted, chemicals were purchased from commercial suppliers at the highest purity grade available and were used without further purification. Thin layer chromatography was performed on Merck pre-coated 0.25 mm silica gel plates (60F-254) using UV light as visualizing agent. Silica gel (60-120 mesh) was used for column chromatography. IR spectra were recorded on FT-IR spectrometer and expressed as wave numbers ( $\text{cm}^{-1}$ ).  $^1\text{H}$  and  $^{13}\text{C}$  NMR spectra were recorded on a Bruker (500 MHz & 125 MHz) and JEOL (400 MHz & 100 MHz) spectrometer. Spectra were referenced internally to the residual proton resonance in  $\text{CDCl}_3$  ( $\delta$  7.26 ppm),  $\text{DMSO-}d^6$  ( $\delta$  2.50 ppm) or with tetramethylsilane (TMS,  $\delta$  0.00 ppm) as the internal standard. Chemical shifts ( $\delta$ ) were reported as part per million (ppm) in  $\delta$  scale downfield from

TMS.  $^{13}\text{C}$  NMR spectra were referenced to  $\text{CDCl}_3$  ( $\delta$  77.0 ppm, the middle peak) and  $\text{DMSO-}d^6$  ( $\delta$  39.5 ppm, the middle peak). Coupling constants were expressed in Hz. The following abbreviations were used to explain the multiplicities: s = singlet, d = doublet, t = triplet, dt = doublet of triplet, m = multiples, br = broad, dd = doublet of doublet. High-resolution mass spectra (HRMS) were obtained on a Bruker micrOTOF<sup>TM</sup>-Q II mass spectrometer (ESIMS).

#### Failed Scheme:

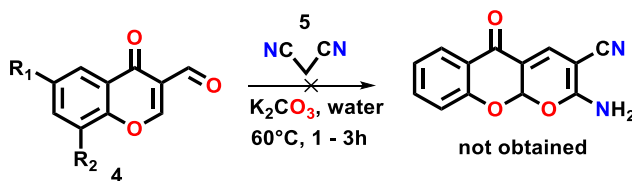

Scheme S1: Synthesis of 2H-Pyran

#### Compound characterizations:

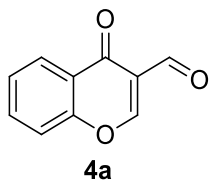

#### 4-oxo-4H-chromene-3-carbaldehyde **4a**:

Colour and state: Yellow solid; (1.67 g, 96% yield).  $^1\text{H}$  NMR(500MHz,  $\text{CDCl}_3$ )  $\delta$  ppm: 7.50(t,  $J$  = 7.5Hz, 1H), 7.53(d,  $J$  = 8Hz, 1H), 7.53(t,  $J$  = 7Hz, 1H), 8.29(d,  $J$  = 7.5Hz, 1H), 8.54(s, 1H), 10.38(s, 1H);  $^{13}\text{C}$  NMR (125MHz,  $\text{CDCl}_3$ )  $\delta$  ppm: 118.5, 120.3, 125.2, 126.1, 126.6, 134.8, 156.1, 160.5, 175.9, 188.5; FTIR (KBr,  $\nu = \text{cm}^{-1}$ ) 764, 844, 1310, 1400, 13, 1561, 1613, 1648, 1693, 2866, 3133, 3415; HRMS (ESI<sup>+</sup>):  $m/z$  calcd. for  $\text{C}_{10}\text{H}_6\text{O}_3\text{Na}$   $[\text{M}+\text{Na}]^+$ : 197.0215, found 197.0211.

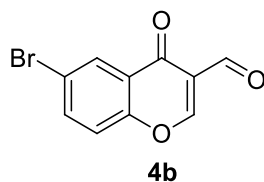

**6-bromo-4-oxo-4H-chromene-3-carbaldehyde 4b:**

Colour and state: Pale Yellow solid .Yield: 87 %; <sup>1</sup>H NMR (400MHz, CDCl<sub>3</sub>) δ ppm: 7.44 (1H, d, J = 8.7 Hz), 7.83 (1H, dd, J = 8.9, 2.5 Hz), 8.40 (1H, d, J = 2.3 Hz), 8.53 (1H, s), 10.35 (1H, s). <sup>13</sup>C NMR (100MHz, CDCl<sub>3</sub>) δ ppm: 115.9, 120.3, 120.4, 126.5, 128.7, 137.7, 154.9, 160.6, 174.6, 188.0; FTIR (KBr, ν = cm<sup>-1</sup>) 604, 768, 831, 1118, 1300, 1442, 1460, 1553, 1653, 1692, 2866, 3074, 3416; HRMS (ESI+): *m/z* calcd. for C<sub>10</sub>H<sub>5</sub>BrO<sub>3</sub>Na [M+Na]<sup>+</sup>: 274.9320, found 274.9318

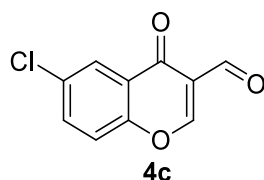

**6-chloro-4-oxo-4H-chromene-3-carbaldehyde 4c:**

Colour and state: Yellow solid; Yield: 90 %; <sup>1</sup>H-NMR (400 MHz, CDCl<sub>3</sub>) δ ppm 7.50 (1H, d, J = 8.7 Hz), 7.68 (1H, dd, J = 8.7, 2.3 Hz), 8.22 (1H, d, J = 2.7 Hz), 10.33 (1H, s), 8.53 (1H, s); <sup>13</sup>C NMR (100MHz, CDCl<sub>3</sub>) δppm: 120.1, 120.2, 125.5, 126.2, 132.7, 134.9, 154.4, 160.6, 174.7, 188.0. FTIR (KBr, ν = cm<sup>-1</sup>) 670, 768, 115, 1303, 1446, 1465, 1559, 1605, 1657, 1694, 2857, 3079, 3420; HRMS (ESI+): *m/z* calcd. for C<sub>10</sub>H<sub>5</sub>ClO<sub>3</sub>Na [M+Na]<sup>+</sup>: 230.9825, found 230.9822

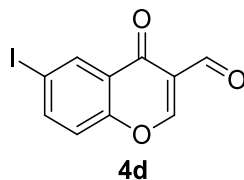

**6-iodo-4-oxo-4H-chromene-3-carbaldehyde 4d:**

Colour and state : Yellow solid; Yield: 88 %; <sup>1</sup>H-NMR (400MHz, CDCl<sub>3</sub>) δ ppm: 7.29 (1H, d, J = 8.7 Hz), 7.99 (1H, d, J = 8.7 Hz), 8.52 (1H, s), 8.56 (1H, s), 10.31 (1H, s); <sup>13</sup>C NMR(100MHz, CDCl<sub>3</sub>) δ ppm: 90.8, 120.4, 132.7, 134.9, 138.9, 143.3, 151.8, 160.6, 174.4, 188.0; FTIR (KBr, ν = cm<sup>-1</sup>) 766, 817, 953, 1115, 1395, 1400, 1550, 1594, 1658, 1691, 2866, 3141, 3420; HRMS (ESI+): *m/z* calcd. for C<sub>10</sub>H<sub>5</sub>IO<sub>3</sub>Na [M+Na]<sup>+</sup>: 322.9181, found 322.9177.

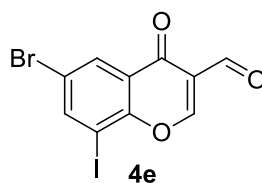

**6-bromo-8-iodo-4-oxo-4H-chromene-3-carbaldehyde 4e:**

Colour and state: Yellow solid; Yield: 84 %; <sup>1</sup>H NMR (400MHz, CDCl<sub>3</sub>) δ ppm: 8.29 (1H, d, J = 2.3 Hz), 8.36 (1H, d, J = 2.3 Hz), 8.60 (1H, s), 10.33 (1H, s). <sup>13</sup>C NMR (100MHz, CDCl<sub>3</sub>) δ ppm: 86.5, 120.0, 120.8, 126.8, 129.0, 146.5, 14.2, 160.7, 174.3, 187.6; FTIR (KBr, ν = cm<sup>-1</sup>) 769, 782, 956, 1295, 1400, 1442, 1541, 1590, 1665, 1695, 2863, 3063, 3451; HRMS (ESI+): *m/z* calcd. for C<sub>10</sub>H<sub>4</sub>BrIO<sub>3</sub>Na [M+Na]<sup>+</sup>: 400.8286, found 400.8281.

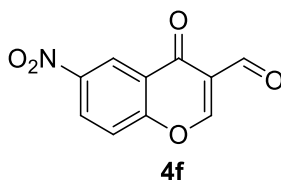

**6-nitro-4-oxo-4H-chromene-3-carbaldehyde 4f:**

Colour and state : Yellow solid; Yield: 86 %;  $^1\text{H}$  NMR (400MHz,  $\text{CDCl}_3$ )  $\delta$  ppm: 7.73 (1H, d, J = 9.2 Hz), 8.57 – 8.60 (2H, m), 9.15 (1H, d, J = 2.7 Hz) 10.37 (1H, s);  $^{13}\text{C}$  NMR (100MHz,  $\text{CDCl}_3$ )  $\delta$ ppm: 120.5, 122.6, 125.6, 129.1, 145.6, 158.7, 160.7, 174.4, 187.4; FTIR (KBr,  $\nu = \text{cm}^{-1}$ ) 517, 657, 773, 892, 1122, 1304, 1349, 1460, 1529, 1564, 1626, 1659, 1700, 2890, 3069, 3101, 3416; HRMS (ESI+):  $m/z$ calcd.for  $\text{C}_{10}\text{H}_5\text{NO}_5\text{Na}$   $[\text{M}+\text{Na}]^+$ : 242.0065, found 242.0063.

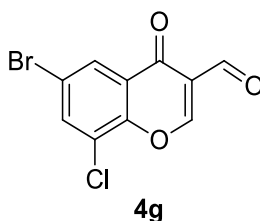

**6-bromo-8-chloro-4-oxo-4H-chromene-3-carbaldehyde 4g:**

Colour and state: Yellow solid; Yield: 87 %;  $^1\text{H}$  NMR (400MHz,  $\text{CDCl}_3$ )  $\delta$  ppm: 7.93 (1H, s), 8.29 (1H, s), 8.59 (1H, s), 10.32 (1H, s);  $^{13}\text{C}$  NMR (100MHz,  $\text{CDCl}_3$ )  $\delta$  ppm: 119.7, 120.2, 125.8, 127.3, 132.9, 137.6, 140.6, 160.6, 174.1, 187.6; FTIR (KBr,  $\nu = \text{cm}^{-1}$ ) 767, 1059, 1300, 1400, 1447, 1554, 1598, 1657, 1701, 2866, 3141, 3417; HRMS (ESI+):  $m/z$  calcd. for  $\text{C}_{10}\text{H}_4\text{BrClO}_3\text{Na}$   $[\text{M}+\text{Na}]^+$ : 308.8930, found 308.8926.

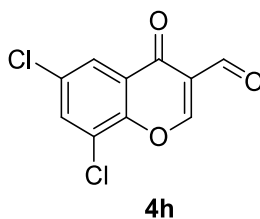

**6,8-dichloro-4-oxo-4H-chromene-3-carbaldehyde 4h:**

Colour and state : Yellow solid; Yield: 89 %;  $^1\text{H}$  NMR (400MHz,  $\text{CDCl}_3$ )  $\delta$  ppm: 7.78 (1H, d, J = 1.8 Hz), 8.14 (1H, d, J = 1.8 Hz), 8.58 (1H, s), 10.33 (1H, s);  $^{13}\text{C}$  NMR (100MHz,  $\text{CDCl}_3$ )  $\delta$  ppm: 120.2, 124.1, 125.0, 127.1, 132.5, 134.9, 150.5, 160.4, 174.1, 187.5; FTIR (KBr,  $\nu = \text{cm}^{-1}$ ) 672, 770, 844, 1303, 1399, 1451, 1561, 1600, 1664, 1700, 2872, 3066, 3122, 3417; HRMS (ESI+):  $m/z$  calcd. for  $\text{C}_{10}\text{H}_4\text{Cl}_2\text{O}_3\text{Na}$   $[\text{M}+\text{Na}]^+$ : 264.9435, found 264.9434.

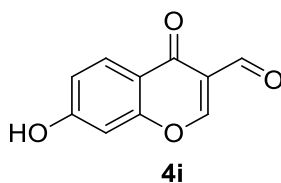

#### **7-hydroxy-4-oxo-4H-chromene-3-carbaldehyde 4i:**

Colour and state: Dark brownish solid; Yield: 72 %.  $^1\text{H}$  NMR (400MHz,  $\text{DMSO-D}_6$ )  $\delta$  ppm: 6.93 (1H, s) 6.97 (1H, d, J = 8.8 Hz), 7.94 (1H, d, J = 8.8 Hz), 8.73 (1H, s), (10.07 (1H, s);  $^{13}\text{C}$  NMR (100MHz,  $\text{CDCl}_3$ )  $\delta$  ppm: 103.1, 116.1, 116.9, 119.6, 127.1, 157.4, 162.7, 163.6, 174.1, 188.7; FTIR (KBr,  $\nu = \text{cm}^{-1}$ ) 770, 850, 1093, 1306, 1401, 1460, 1613, 1639, 1685, 3121, 3420; HRMS (ESI+):  $m/z$  calcd. for  $\text{C}_{10}\text{H}_6\text{O}_4\text{Na}$   $[\text{M}+\text{Na}]^+$ : 213.0164, found 213.0158

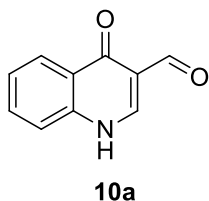

#### **4-oxo-1,4-dihydroquinoline-3-carbaldehyde 10a<sup>1</sup> :**

Colour and state : Pale yellow solid; Yield: 87 %;  $^1\text{H}$  NMR(400MHz,  $\text{DMSO-D}_6$ ) $\delta$  ppm: 7.45 (1H, t, J = 7.6 Hz), 7.64 (1H, d, J = 8.2 Hz), 7.74 (1H, t, J = 7.6 Hz), 8.19 (1H, d, J = 7.8 Hz), ), 8.46 (1H, s), 10.18 (1H, s ),12.68(1H, s);  $^{13}\text{C}$  NMR(100MHz,  $\text{DMSO-D}_6$ )  $\delta$  ppm: 116.3, 119.4,

125.3, 125.4, 127.7, 133.0, 139.3, 143.2, 176.2, 188.7; FTIR (KBr,  $\nu = \text{cm}^{-1}$ ) 438, 628, 768, 852, 974, 1284, 1389, 1558, 1620, 1666, 2737, 3126, 3419; HRMS (ESI+):  $m/z$  calcd. for  $\text{C}_{10}\text{H}_7\text{O}_2\text{NNa}$   $[\text{M}+\text{Na}]^+$ : 196.0374, found 196.0371.

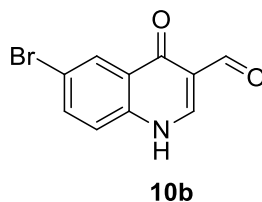

**6-bromo-4-oxo-1,4-dihydroquinoline-3-carbaldehyde 10b:**

Colour and state: yellow solid; Yield: 87 %;  $^1\text{H}$  NMR (400MHz, DMSO- $\text{D}_6$ )  $\delta$  ppm: 7.62 (1H, d,  $J = 9.2$  Hz), 7.91 (1H, d,  $J = 9.2$  Hz), 8.25 (1H, s), 8.51 (1H, d,  $J = 6.4$  Hz), 10.15 (1H, s), 12.83 (1H, s).  $^{13}\text{C}$  NMR (100MHz, DMSO- $\text{D}_6$ )  $\delta$  ppm: 116.5, 118.2, 121.2, 127.4, 129.2, 135.7, 138.4, 143.6, 174.9, 188.5; FTIR (KBr,  $\nu = \text{cm}^{-1}$ ); 540, 625, 826, 826, 991, 1068, 1306, 13999, 1471, 1531, 1582, 1624, 1682, 1701, 3453; HRMS (ESI+):  $m/z$  calcd. for  $\text{C}_{10}\text{H}_6\text{BrO}_2\text{NNa}$   $[\text{M}+\text{Na}]^+$ : 273.9480, found 273.9478.

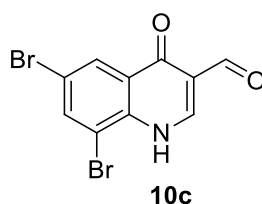

**6,8-dibromo-4-oxo-1,4-dihydroquinoline-3-carbaldehyde 10c:**

Colour and state : yellow solid; Yield: 87 %;  $^1\text{H}$  NMR (400MHz, DMSO- $\text{D}_6$ )  $\delta$  ppm: 8.18 (1H, d,  $J = 2.8$  Hz), 8.23 (1H, s), 8.27 (1H, d,  $J = 1.8$  Hz), 10.10 (1H, s), 12.01 (1H, s);  $^{13}\text{C}$  NMR (100MHz, DMSO- $\text{D}_6$ )  $\delta$  ppm: 114.0, 116.6, 117.9, 127.3, 130.0, 136.3, 138.2, 143.9, 174.2,

188.2; FTIR (KBr,  $\nu = \text{cm}^{-1}$ ); 626, 765, 965, 1097, 1331, 1398, 1458, 1574, 1688, 2878, 3139. 3416. HRMS (ESI+):  $m/z$  calcd. for  $\text{C}_{10}\text{H}_5\text{Br}_2\text{O}_2\text{NNa}$   $[\text{M}+\text{Na}]^+$ : 351.8585, found 351.8581.

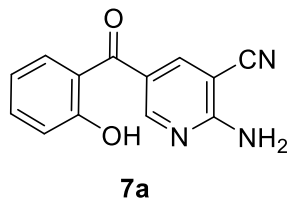

**2-amino-5-oxo-2,5-dihydro-1H-chromeno[2,3-b]pyridine-3-carbonitrile 7a:**

Colour and state : Yellow solid; Yield: 98%;  $^1\text{H}$  NMR (400MHz, DMSO- $\text{D}_6$ )  $\delta$  ppm 6.90-6.96 (2H, m), 7.33 (1H, d,  $J = 7.8$  Hz), 7.40 (1H, t,  $J = 7.6$  Hz), 7.81 (2H, s, br.  $\text{D}_2\text{O}$  exchangeable), 8.11 (1H, d,  $J = 1.8$  Hz), 8.48 (1H, d,  $J = 2.3$  Hz), 10.27 (1H, s, br.  $\text{D}_2\text{O}$  exchangeable );  $^1\text{H}$ -NMR (400 MHz, DMSO- $\text{D}_6$ ) (After  $\text{D}_2\text{O}$  exchange)  $\delta$  ppm 6.82-6.97 (2H, m), 7.26 (1H, d,  $J = 7.8$  Hz), 7.37 (1H, t,  $J = 7.8$  Hz), 8.04 (1H, s), 8.40 (1H, s);  $^{13}\text{C}$  NMR (100MHz, DMSO- $\text{D}_6$ )  $\delta$ ppm: 88.9, 116.1, 116.6, 119.3, 121.8, 124.7, 130.1, 133.0, 143.9, 155.6, 156.0, 161.3, 192.1; FTIR (KBr,  $\nu = \text{cm}^{-1}$ ) 759, 1150, 1250, 1346, 1402, 1595, 1621, 1672, 2222, 2878, 3138, 3416; HRMS (ESI+):  $m/z$  calcd. for  $\text{C}_{13}\text{H}_9\text{N}_3\text{O}_2\text{Na}$   $[\text{M}+\text{Na}]^+$ : 262.0592, found 262.0588.

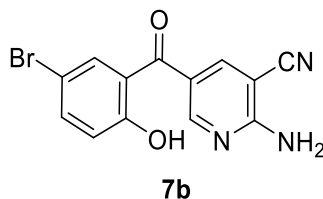

**2-amino-7-bromo-5-oxo-2,5-dihydro-1H-chromeno[2,3-b]pyridine-3-carbonitrile 7b:**

Colour and state: Yellow solid; Yield: 92 %;  $^1\text{H}$  NMR(400MHz, DMSO- $\text{D}_6$ )  $\delta$  ppm: 6.91 (1H, d,  $J = 8.7$  Hz), 7.41 (1H, d,  $J = 2.3$  Hz), 7.52 (1H, dd,  $J = 8.7, 2.3$  Hz), 7.86 (2H, s, br.  $\text{D}_2\text{O}$  exchangeable), 8.12 (1H, d,  $J = 1.8$  Hz), 8.47 (1H, d,  $J = 2.3$  Hz), 10.38 (1H, s, br.  $\text{D}_2\text{O}$



exchangeable);  $^{13}\text{C}$  NMR(100MHz, DMSO-D6)  $\delta$ ppm: 88.9, 110.3, 116.0, 118.8, 121.4, 127.6, 131.7, 134.8, 143.9, 154.5, 155.7, 161.4, 190.1; FTIR (KBr,  $\nu = \text{cm}^{-1}$ ) 496, 1167, 1270, 1409, 1498, 1579, 1626, 1640; 2227, 2856, 3220, 3329, 3445; HRMS (ESI+):  $m/z$  calcd. for  $\text{C}_{13}\text{H}_8\text{BrN}_3\text{O}_2\text{Na}$   $[\text{M}+\text{Na}]^+$ : 339.9698, found 339.9697.

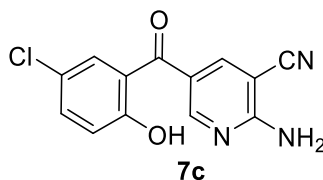

**2-amino-7-chloro-5-oxo-2,5-dihydro-1H-chromeno[2,3-b]pyridine-3-carbonitrile 7c:**

Colour and state: Yellow solid; Yield: 94 %;  $^1\text{H}$  NMR (400MHz, DMSO-D6)  $\delta$  ppm: 6.96 (1H, d,  $J = 8.7$  Hz), 7.30 (1H, d,  $J = 2.7$  Hz), 7.41 (1H, dd,  $J = 8.9, 2.5$  Hz), 7.86 (2H, s, br.  $\text{D}_2\text{O}$  exchangeable), 8.12 (1H, d,  $J = 1.8$  Hz), 8.47 (1H, d,  $J = 1.8$  Hz), 10.37 (1H, s, br.  $\text{D}_2\text{O}$  exchangeable);  $^{13}\text{C}$  NMR (100MHz, DMSO-D6)  $\delta$  ppm: 88.9, 116.0, 118.3, 121.1, 122.9, 127.0, 128.9, 132.0, 144.0, 154.1, 155.7, 161.4, 190.2; FTIR (KBr,  $\nu = \text{cm}^{-1}$ ) 496, 539, 785, 1166, 1268, 1336, 1499, 1578, 1629, 1640, 2227, 2845, 3220, 3327, 3445; HRMS (ESI+):  $m/z$ calcd.for  $\text{C}_{13}\text{H}_8\text{ClN}_3\text{O}_2\text{Na}$   $[\text{M}+\text{Na}]^+$ : 296.0203, found 292.0201.

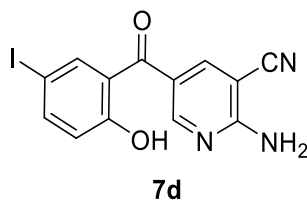

**2-amino-7-iodo-5-oxo-2,5-dihydro-1H-chromeno[2,3-b]pyridine-3-carbonitrile 7d:**

Colour and state: Brown solid; Yield: 91 %;  $^1\text{H}$  NMR (400MHz, DMSO-D6)  $\delta$  ppm: 6.79 (1H, d,  $J = 8.7$  Hz), 7.54 (1H, s), 7.67 (1H, d,  $J = 8.2$  Hz), 7.86 (2H, s, br.  $\text{D}_2\text{O}$  exchangeable), 8.11

(1H, s), 8.46 (1H, s), 10.37 (1H, s, br. D<sub>2</sub>O exchangeable); <sup>13</sup>C NMR (100MHz, DMSO-D<sub>6</sub>) δ ppm: 81.2, 88.9, 116.0, 119.2, 121.1, 128.1, 137.4, 140.6, 143.9, 155.0, 155.7, 161.4, 190.1; FTIR (KBr, ν = cm<sup>-1</sup>) 529, 788, 1077, 1294, 1400, 1546, 1618, 1649, 2216, 2878, 3131, 3432; HRMS (ESI<sup>+</sup>): *m/z* calcd. for C<sub>13</sub>H<sub>8</sub>IN<sub>3</sub>O<sub>2</sub>Na [M+Na]<sup>+</sup>: 387.9559, found 387.9552.

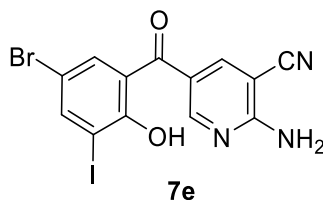

**2-amino-7-bromo-9-iodo-5-oxo-2,5-dihydro-1H-chromeno[2,3-b]pyridine-3-carbonitrile 7e:**

Colour and state: Yellow solid; Yield: 86 %; <sup>1</sup>H NMR (400MHz, DMSO-D<sub>6</sub>) δ ppm: 7.50 (1H, d, J = 2.3 Hz), 7.91 (2H, s, br. D<sub>2</sub>O exchangeable), 8.09 (1H, d, J = 1.8 Hz), 8.16 (1H, d, J = 2.3 Hz), 8.48 (1H, d, J = 1.8 Hz), 10.60 (1H, s, br. D<sub>2</sub>O exchangeable); <sup>13</sup>C NMR (100MHz, DMSO-D<sub>6</sub>) δ ppm: 89.0, 90.3, 116.6, 115.9, 120.8, 126.5, 132.3, 143.3, 144.3, 154.7, 155.7, 161.4, 190.5; FTIR (KBr, ν = cm<sup>-1</sup>) 791,1062, 1274, 1404, 1578, 1616, 1635, 2227, 2875, 3185, 3416; HRMS (ESI<sup>+</sup>): *m/z* calcd. for C<sub>13</sub>H<sub>7</sub>BrIN<sub>3</sub>O<sub>2</sub>Na [M+Na]<sup>+</sup>: 465.8664, found 465.8659

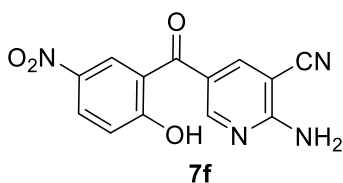

**2-amino-7-nitro-5-oxo-2,5-dihydro-1H-chromeno[2,3-b]pyridine-3-carbonitrile 7f:**

Colour and state: Brownish solid; Yield: 78 %; <sup>1</sup>H NMR (400MHz, DMSO-D<sub>6</sub>) δ ppm: 7.11 (1H, d, J = 9.2 Hz), 7.92 (2H, s, br. D<sub>2</sub>O exchangeable), 8.15 (1H, d, J = 2.7 Hz), 8.19 (1H, d, J = 2.3 Hz), 8.26 (1H, dd, J = 8.9, 3.0 Hz), 8.52 (1H, d, J = 2.3 Hz), 11.74 (1H, s, br. D<sub>2</sub>O

exchangeable);  $^{13}\text{C}$  NMR(100MHz, DMSO-D<sub>6</sub>)  $\delta$ ppm: 89.0, 115.9, 117.2, 121.2, 125.9, 126.1, 127.8, 139.5, 144.1, 155.8, 161.2, 161.5, 189.5; FTIR (KBr,  $\nu = \text{cm}^{-1}$ ) 534, 650, 806, 1100, 1266, 1349, 1400, 1475, 1542, 1594, 1631, 1660, 2227, 2879, 3146, 3412; HRMS (ESI+):  $m/z$  calcd. for  $\text{C}_{13}\text{H}_8\text{N}_4\text{O}_4\text{Na}$   $[\text{M}+\text{Na}]^+$ : 307.0443, found 307.0438.

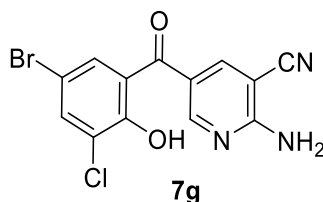

**2-amino-7-bromo-9-chloro-5-oxo-2,5-dihydro-1H-chromeno[2,3-b]pyridine-3-carbonitrile**

**7g:** Colour and state: Yellow solid; Yield: 82 %;  $^1\text{H}$  NMR (400MHz, DMSO-D<sub>6</sub>)  $\delta$  ppm: 7.43 (1H, d,  $J = 2.3$  Hz), 7.82 (1H, d,  $J = 2.3$  Hz), 7.91 (2H, s, br. D<sub>2</sub>O exchangeable), 8.17 (1H, d,  $J = 2.3$  Hz), 8.49 (1H, d,  $J = 1.8$  Hz), 10.38 (1H, s, br. D<sub>2</sub>O exchangeable);  $^{13}\text{C}$  NMR (100MHz, DMSO-D<sub>6</sub>)  $\delta$  ppm: 89.0, 110.7, 115.9, 121.0, 123.3, 129.3, 130.6, 134.2, 144.2, 150.4, 155.7, 161.5, 189.6; FTIR (KBr,  $\nu = \text{cm}^{-1}$ ) 514, 791, 1168, 1244, 1327, 1400, 1430, 1620, 1655, 2219, 2874, 3134, 3434; HRMS (ESI+):  $m/z$  calcd. for  $\text{C}_{13}\text{H}_7\text{BrClN}_3\text{O}_2\text{Na}$   $[\text{M}+\text{Na}]^+$ : 373.9308, found 373.9302.

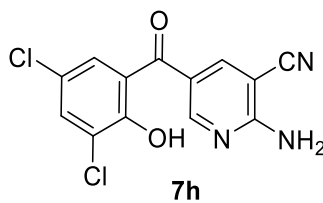

**2-amino-7,9-dichloro-5-oxo-2,5-dihydro-1H-chromeno[2,3-b]pyridine-3-carbonitrile      7h:**

Colour and state: Yellow solid; Yield: 74 %;  $^1\text{H}$  NMR (400MHz, DMSO-D<sub>6</sub>)  $\delta$  ppm: 7.33 (1H, d,  $J = 2.3$  Hz), 7.71 (1H, d,  $J = 2.3$  Hz), 7.93 (2H, s, br. D<sub>2</sub>O exchangeable), 8.17 (1H, d,  $J = 1.8$

Hz), 8.50 (1H, d, J = 2.3 Hz), 10.38 (1H, s, br. D<sub>2</sub>O exchangeable); <sup>13</sup>C NMR (100MHz, DMSO-D<sub>6</sub>) δ ppm: 89.5, 116.5, 121.5, 123.6, 124.1, 128.3, 129.3, 132.1, 144.8, 150.6, 196.3, 162.0, 190.2; FTIR (KBr, ν = cm<sup>-1</sup>) 533, 1233, 1330, 1400, 1424, 1584, 1624, 1638, 2236, 2879, 3178, 3446; HRMS (ESI<sup>+</sup>): *m/z* calcd. for C<sub>13</sub>H<sub>8</sub>Cl<sub>2</sub>N<sub>3</sub>O<sub>2</sub>Na [M+Na]<sup>+</sup>: 329.9813, found 329.9809.

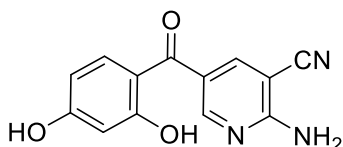

7i

**2-amino-8-hydroxy-5-oxo-2,5-dihydro-1H-chromeno[2,3-b]pyridine-3-carbonitrile 7i:**

Colour and state: Reddish brown solid; Yield: 64 %; <sup>1</sup>H NMR (400MHz, DMSO-D<sub>6</sub>) δ ppm: 6.33 (1H, d, J = 2.3 Hz), 6.38 (1H, dd, J = 8.7, 1.8 Hz), 7.40 (1H, d, J = 8.7 Hz), 7.69 (2H, s, br. D<sub>2</sub>O exchangeable), 8.12 (1H, d, J = 2.3 Hz), 8.47 (1H, d, J = 1.8 Hz), 10.52 (1H, s, br. D<sub>2</sub>O exchangeable), 11.54 (1H, s, br. D<sub>2</sub>O exchangeable); <sup>13</sup>C NMR (100MHz, DMSO-D<sub>6</sub>) δ ppm: 88.6, 102.7, 108.1, 113.6, 116.2, 122.2, 134.1, 143.7, 154.8, 161.0, 162.4, 164.0, 192.9; FTIR (KBr, ν = cm<sup>-1</sup>) 617, 815, 1142, 1258, 1278, 1398, 1497, 1587, 1630, 1627, 2232, 2876, 3157, 3320, 3401; HRMS (ESI<sup>+</sup>): *m/z* calcd. for C<sub>13</sub>H<sub>9</sub>N<sub>3</sub>O<sub>3</sub>Na [M+Na]<sup>+</sup>: 278.0542, found 278.0537.

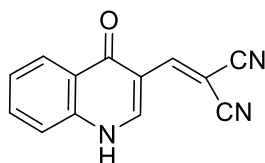

11a

**5-oxo-5,10-dihydrobenzo[b][1,8]naphthyridine-3-carbonitrile 11a:** Colour and state : Yellow solid; Yield: 92 %; <sup>1</sup>H NMR (400MHz, DMSO-D<sub>6</sub>) δ ppm: 7.48 (1H, t, J = 7.8 Hz) 7.59 (1H, d,

$J = 8.3$  Hz), 7.76 (1H, t,  $J = 7.8$  Hz), 8.11 - 8.14 (2H, m), 8.74 (1H, s), 12.99 (1H, s);  $^{13}\text{C}$  NMR(100MHz, DMSO-D6)  $\delta$ ppm: 74.3, 112.6, 114.0, 115.7, 119.5, 125.4, 125.9, 126.0, 133.4, 138.3, 144.3, 154.4, 174.0; FTIR (KBr,  $\nu = \text{cm}^{-1}$ ) 572, 762, 1141, 1283, 1313, 1366, 1400, 1470, 1546, 1625, 2225, 3136, 3420; HRMS (ESI+):  $m/z$  calcd. for  $\text{C}_{13}\text{H}_7\text{N}_3\text{ONa}$   $[\text{M}+\text{Na}]^+$ : 244.0487, found 244.0481.

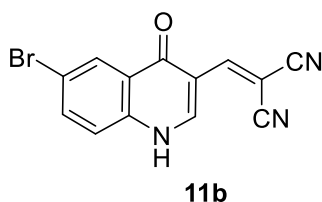

**7-bromo-5-oxo-5,10-dihydrobenzo[b][1,8]naphthyridine-3-carbonitrile 11b:** Colour and state : Yellow solid; Yield: 88 %;  $^1\text{H}$  NMR (400MHz, DMSO-D6)  $\delta$  ppm: 7.53 (1H, d,  $J = 9.2$  Hz), 7.87 (1H, dd,  $J = 9.0, 2.5$  Hz), 8.08 (1H, s), 8.13 (1H, d,  $J = 1.8$  Hz), 8.73 (1H, s), 13.07 (1H, s);  $^{13}\text{C}$  NMR (100MHz, DMSO-D6)  $\delta$  ppm: 75.3, 112.8, 115.5, 118.8, 121.9, 126.7, 127.9, 136.1, 137.3, 144.5, 154.1, 172.8, 188.4; FTIR (KBr,  $\nu = \text{cm}^{-1}$ ) 542, 614, 829, 1309, 1367, 1400, 1536, 1555, 1626, 1682, 2226, 3075, 3166, 3453; HRMS (ESI+):  $m/z$  calcd. for  $\text{C}_{13}\text{H}_6\text{BrN}_3\text{ONa}$   $[\text{M}+\text{Na}]^+$ : 321.9592, found 321.9589.

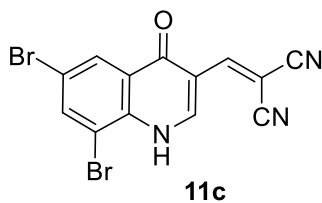

**7,9-dibromo-5-oxo-5,10-dihydrobenzo[b][1,8]naphthyridine-3-carbonitrile 11c:** Colour and state : Yellow solid; Yield: 84 %;  $^1\text{H}$  NMR(400MHz, DMSO-D6)  $\delta$  ppm 8.15-8.28 (2H,m), 8.77 (1H, s), 10.10 (1H, s), 12.05 (1H, s);  $^{13}\text{C}$  NMR(100MHz, DMSO-D6)  $\delta$  ppm: 88.2, 114.0, 116.6,

117.9, 127.3, 127.8, 130.0, 138.2, 138.4, 143.9, 153.6, 174.3, 188.2 ; FTIR (KBr,  $\nu = \text{cm}^{-1}$ ) 530, 805, 873, 1080, 1208, 1365, 1389, 1516, 1561, 1600, 1639, 1700, 2230, 3241, 3450; HRMS (ESI+):  $m/z$  calcd. for  $\text{C}_{13}\text{H}_5\text{Br}_2\text{N}_3\text{ONa}$   $[\text{M}+\text{Na}]^+$ : 399.8697, found 399.8692.

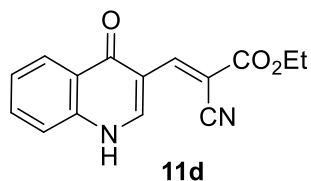

**ethyl 5-oxo-5,10-dihydrobenzo[b][1,8]naphthyridine-3-carboxylate 11d:** Colour and state : Yellow solid; Yield: 82 %;  $^1\text{H}$  NMR (400MHz, DMSO- $\text{D}_6$ )  $\delta$  ppm: 1.28 (3H, t,  $J = 6.4$  Hz) 4.27 (2H, m), 7.46 (1H, t,  $J = 6.9$  Hz), 7.59 (1H, d,  $J = 7.3$  Hz), 7.74 (1H, t,  $J = 6.4$  Hz), 8.15 (1H, d,  $J = 8.3$  Hz), 8.59 (1H, s), 8.95 (1H, s), 12.87 (1H, s);  $^{13}\text{C}$  NMR (100MHz, DMSO- $\text{D}_6$ )  $\delta$  ppm: 14.1, 61.8, 95.3, 111.8, 116.7, 119.4, 125.4, 125.7, 125.9, 133.3, 138.6, 142.1, 148.6, 162.7, 174.7; FTIR (KBr,  $\nu = \text{cm}^{-1}$ ) 1294, 1400, 1555, 1610, 1632, 1718, 3451; HRMS (ESI+):  $m/z$  calcd. for  $\text{C}_{15}\text{H}_{12}\text{N}_2\text{O}_3\text{Na}$   $[\text{M}+\text{Na}]^+$ : 291.0746, found 291.0742

**Spectra:**

nv-230

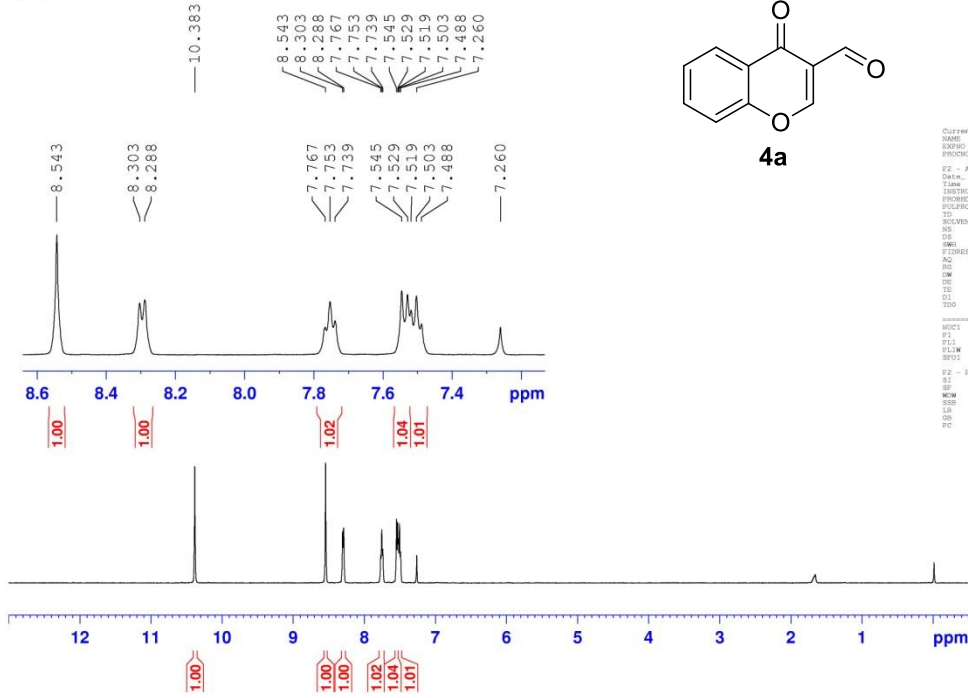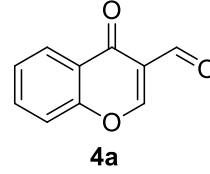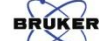

```

Current Data Parameters
NAME      nv-230
EXPNO    1
PROCNO   1
F2 - Acquisition Parameters
Date_    20160224
Time     9.50
INSTRUM  spect
PROBHD   5 mm BBAF1 1H
PULPROG  zgpg30
TD       65536
SOLVENT  CDCl3
NS       14
DS       2
SWH      10330.178 Hz
FIDRES   0.127632 Hz
AQ       3.3726077 sec
RG       6440
SQ       14440
WDW      EM
SSB      0
GB       0.30 Hz
PC       1.00000000 sec
===== CHANNEL f1 =====
NUC1      13C
P1        9.00 usec
PL1       0.00 dB
PL12      14.9724056 dB
SFO1      100.628350 MHz
F2 - Processing parameters
SI        32768
SF        100.628350 MHz
WDW      EM
SSB      0
GB       0.30 Hz
PC       1.00
  
```

nv-230- c13

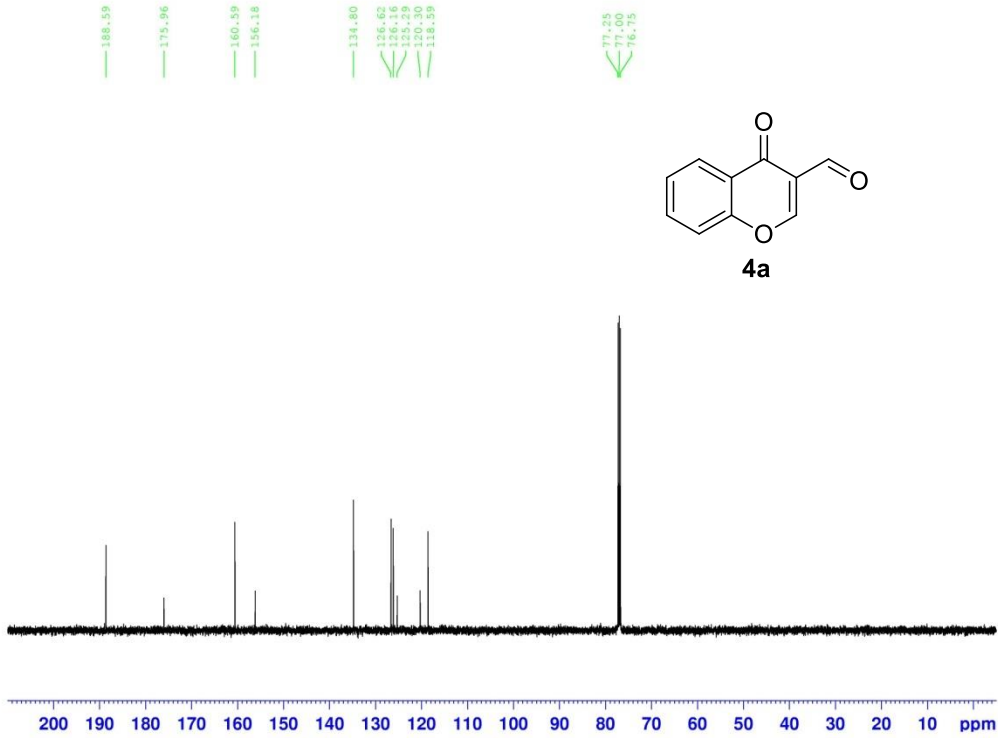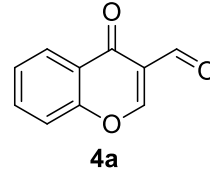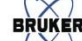

```

Current Data Parameters
NAME      nv-230
EXPNO    1
PROCNO   1
F2 - Acquisition Parameters
Date_    20160224
Time     9.50
INSTRUM  spect
PROBHD   5 mm BBAF1 1H
PULPROG  zgpg30
TD       65536
SOLVENT  CDCl3
NS       14
DS       2
SWH      30036.029 MHz
FIDRES   0.488222 MHz
AQ       1.7892117 sec
RG       6440
SQ       14440
WDW      EM
SSB      0
GB       0.30 Hz
PC       1.00000000 sec
===== CHANNEL f1 =====
NUC1      13C
P1        9.00 usec
PL1       0.00 dB
PL12      14.9724056 dB
SFO1      100.628350 MHz
F2 - Processing parameters
SI        32768
SF        100.628350 MHz
WDW      EM
SSB      0
GB       0.30 Hz
PC       1.45
  
```

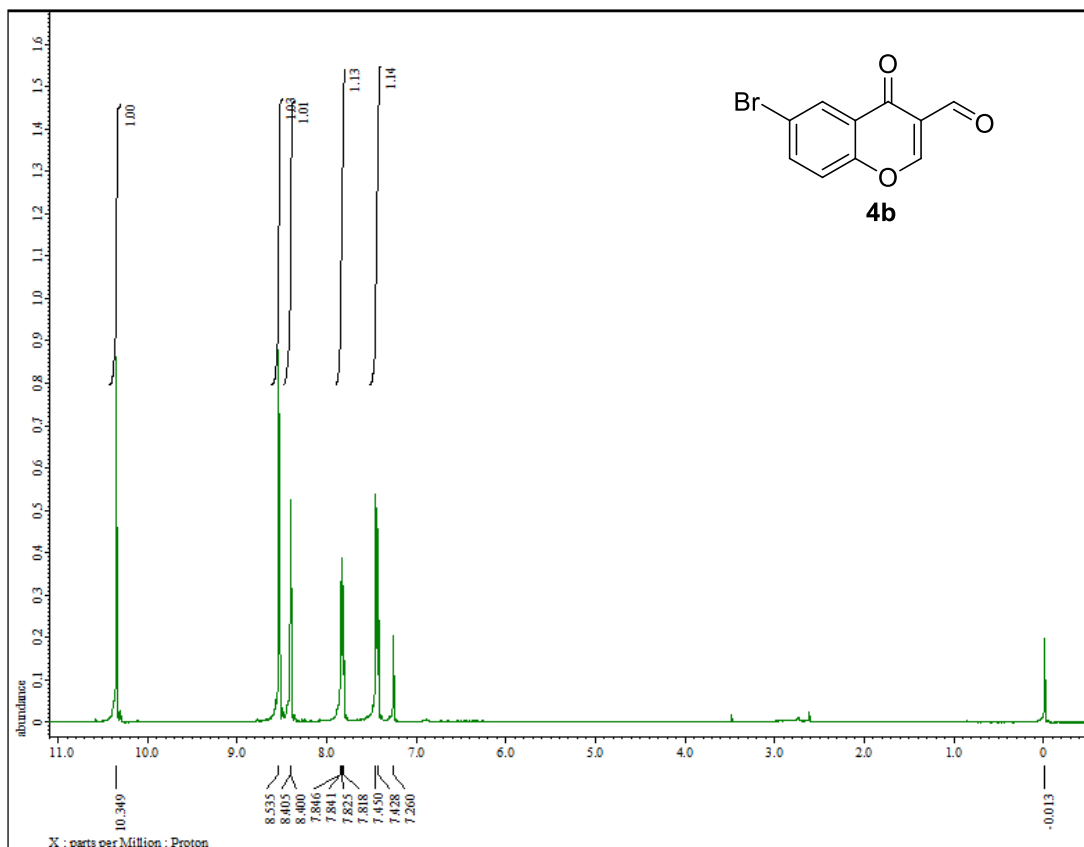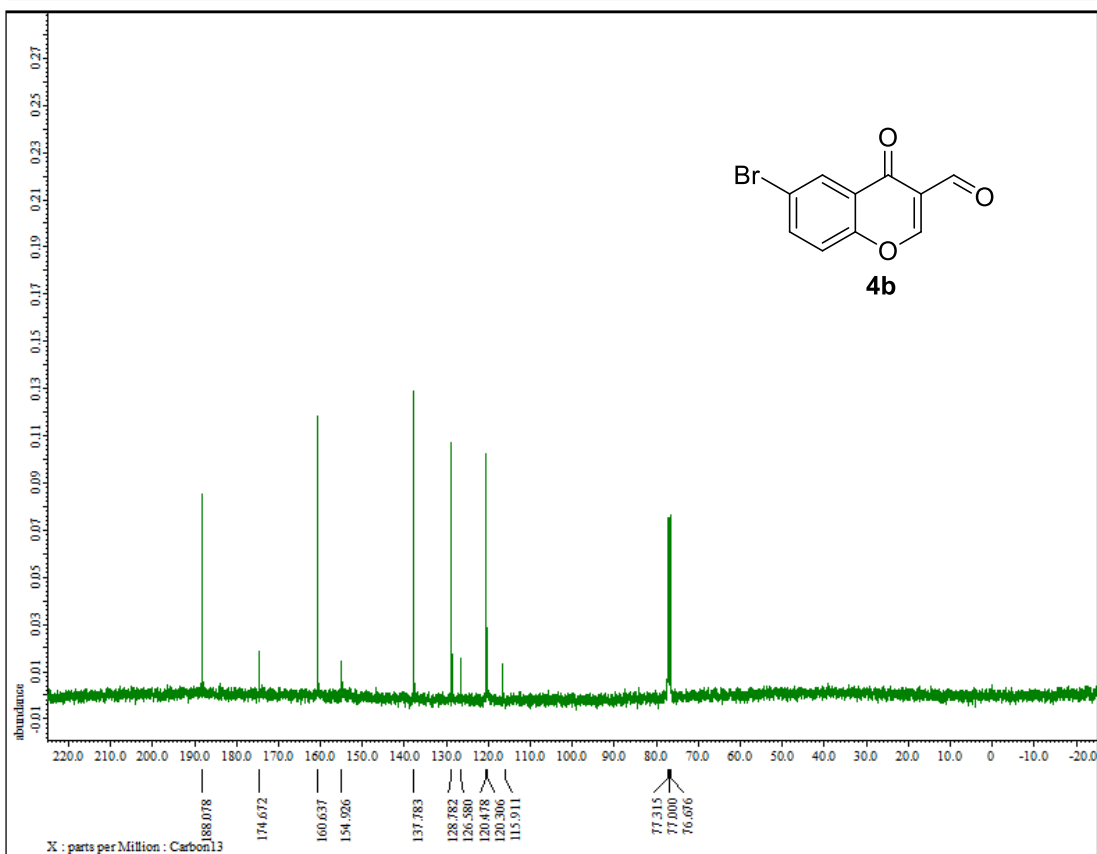



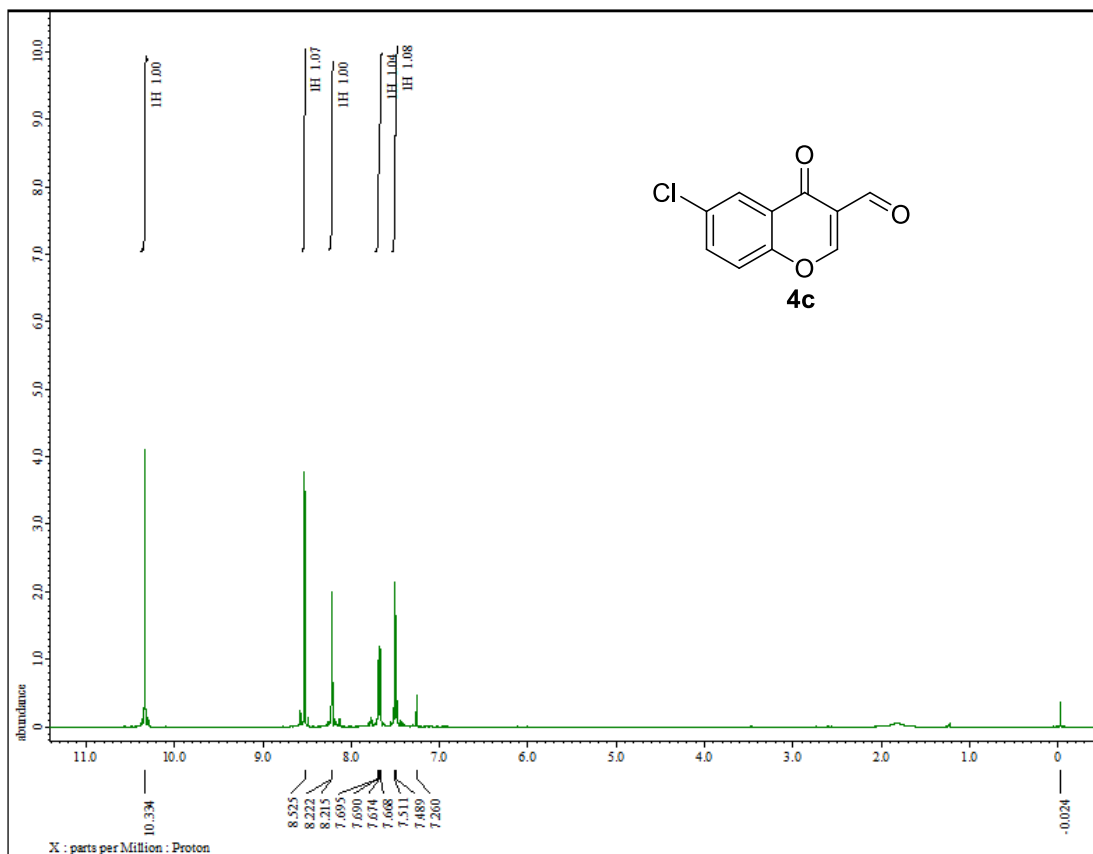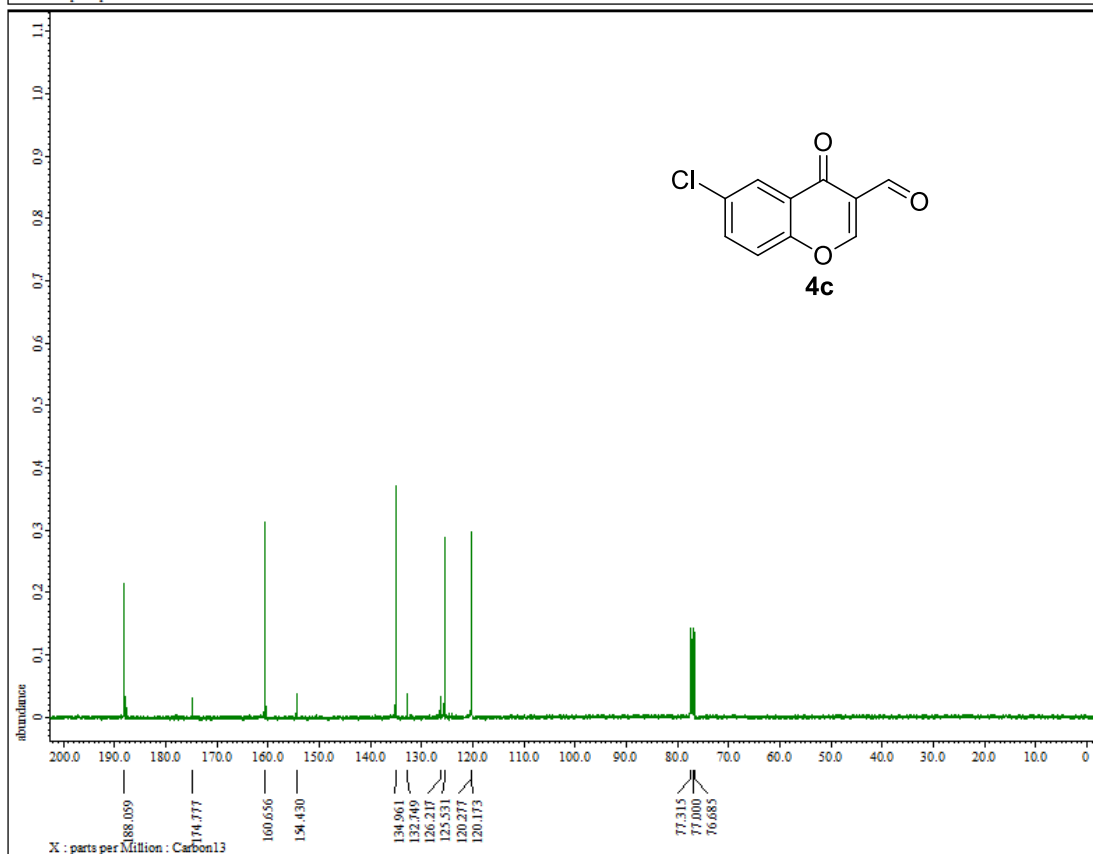

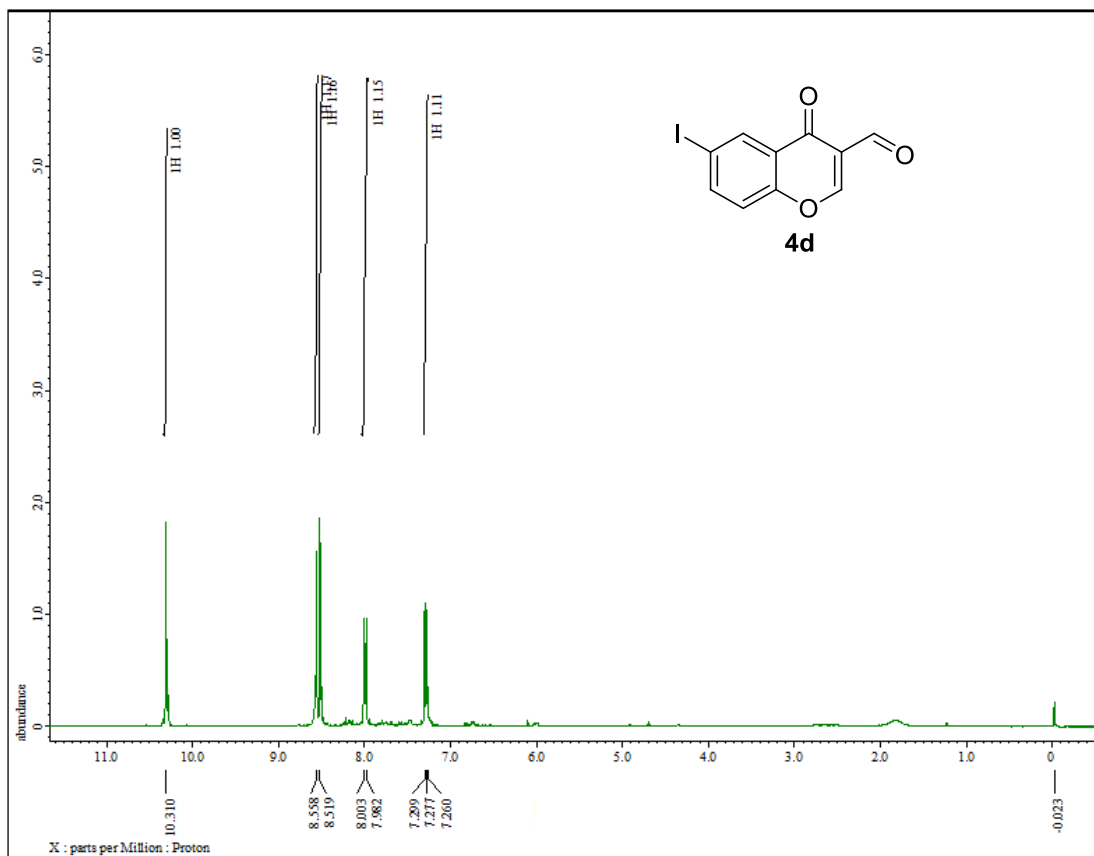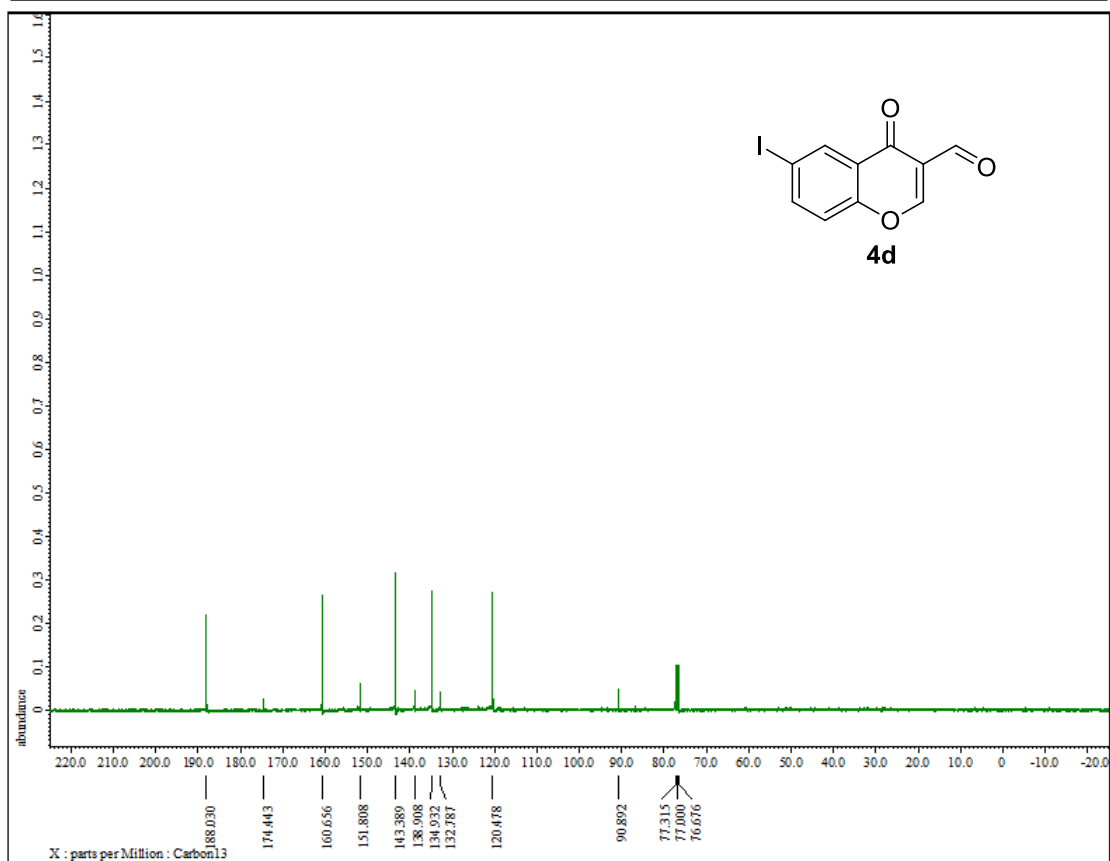

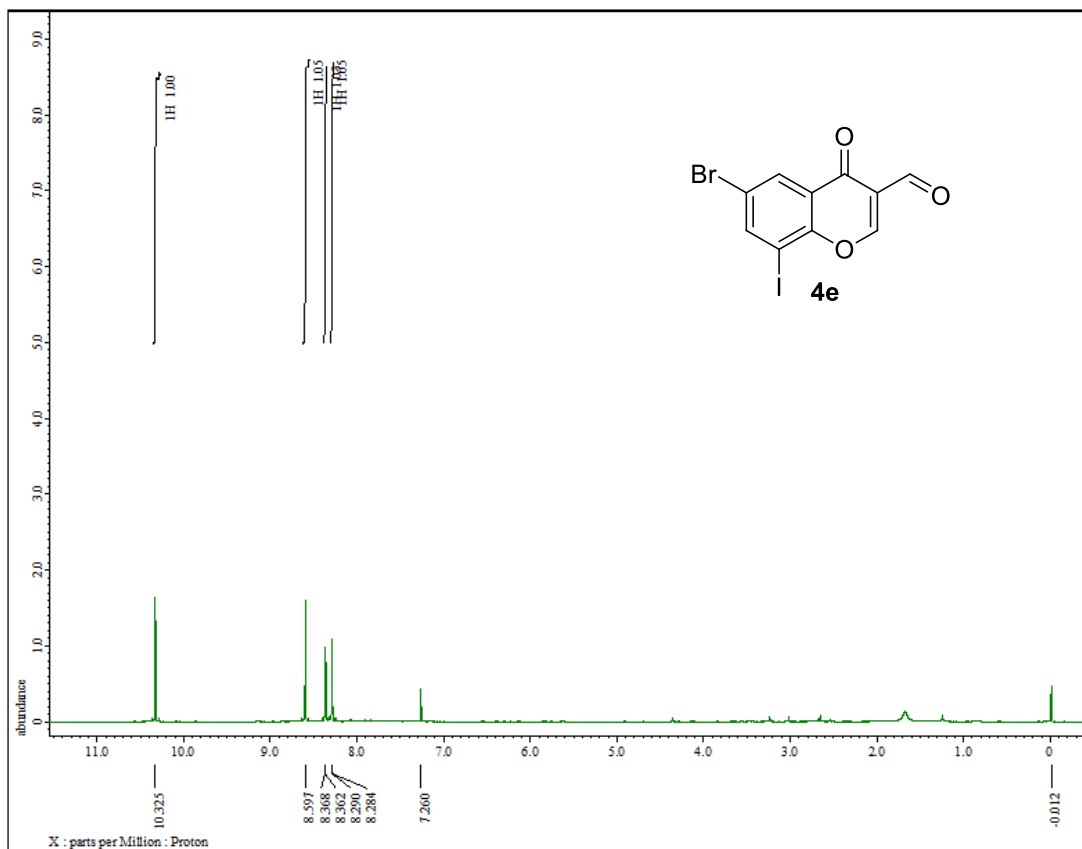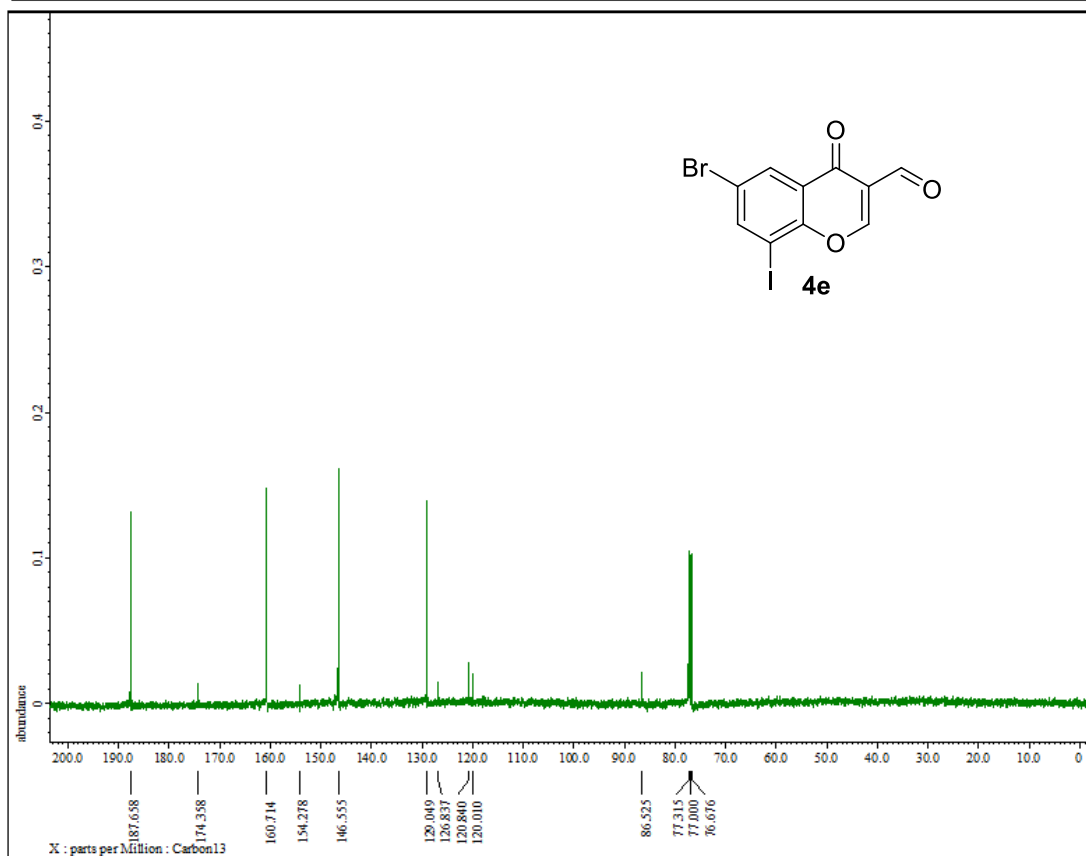

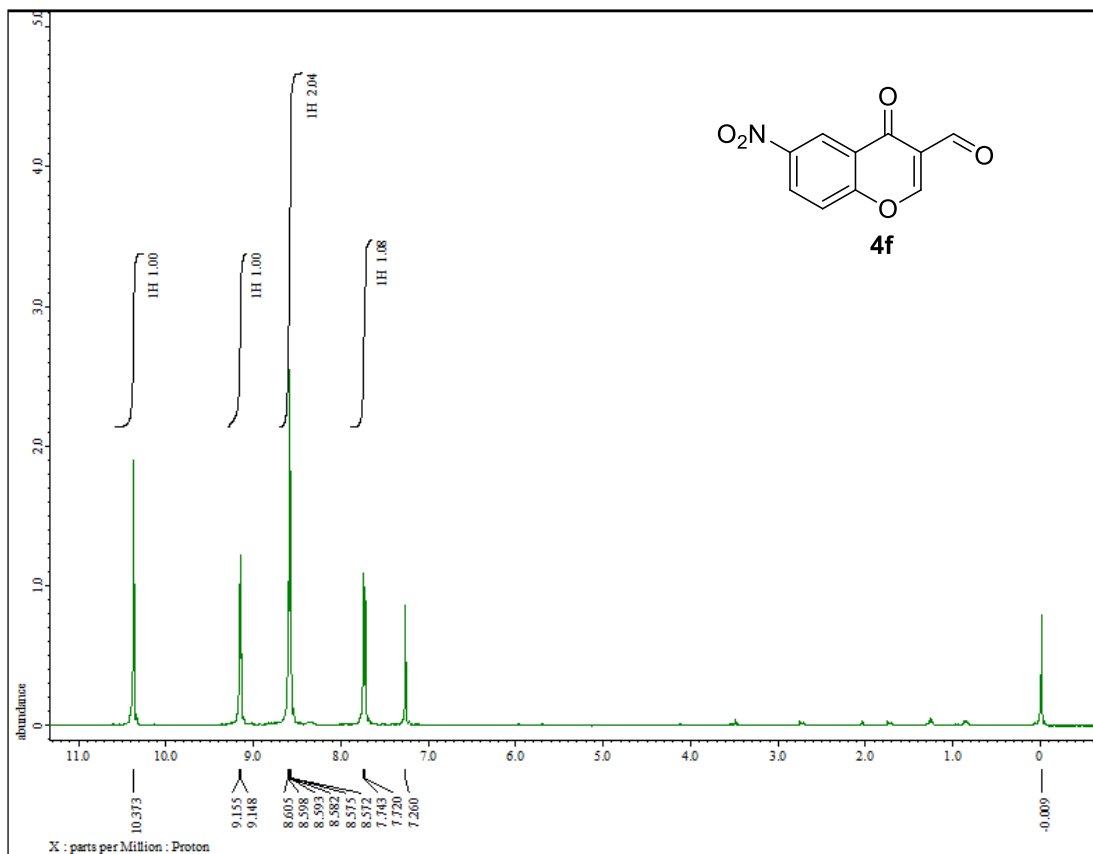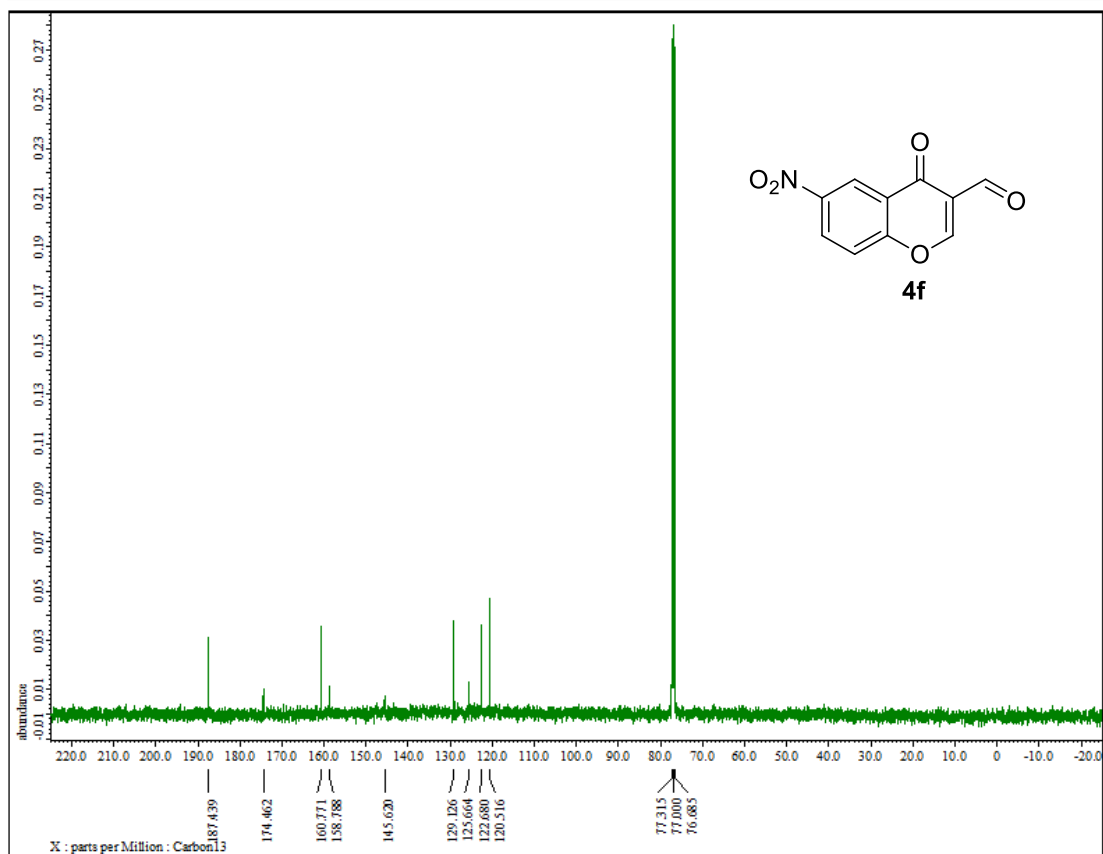

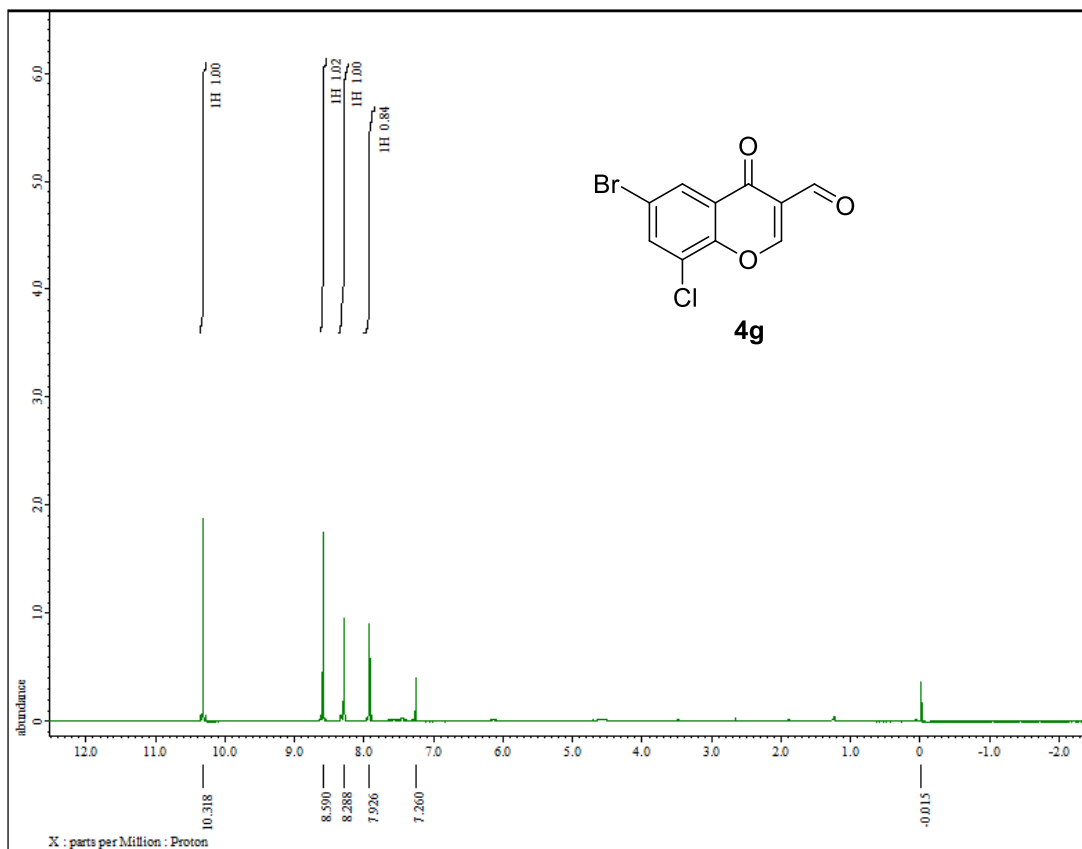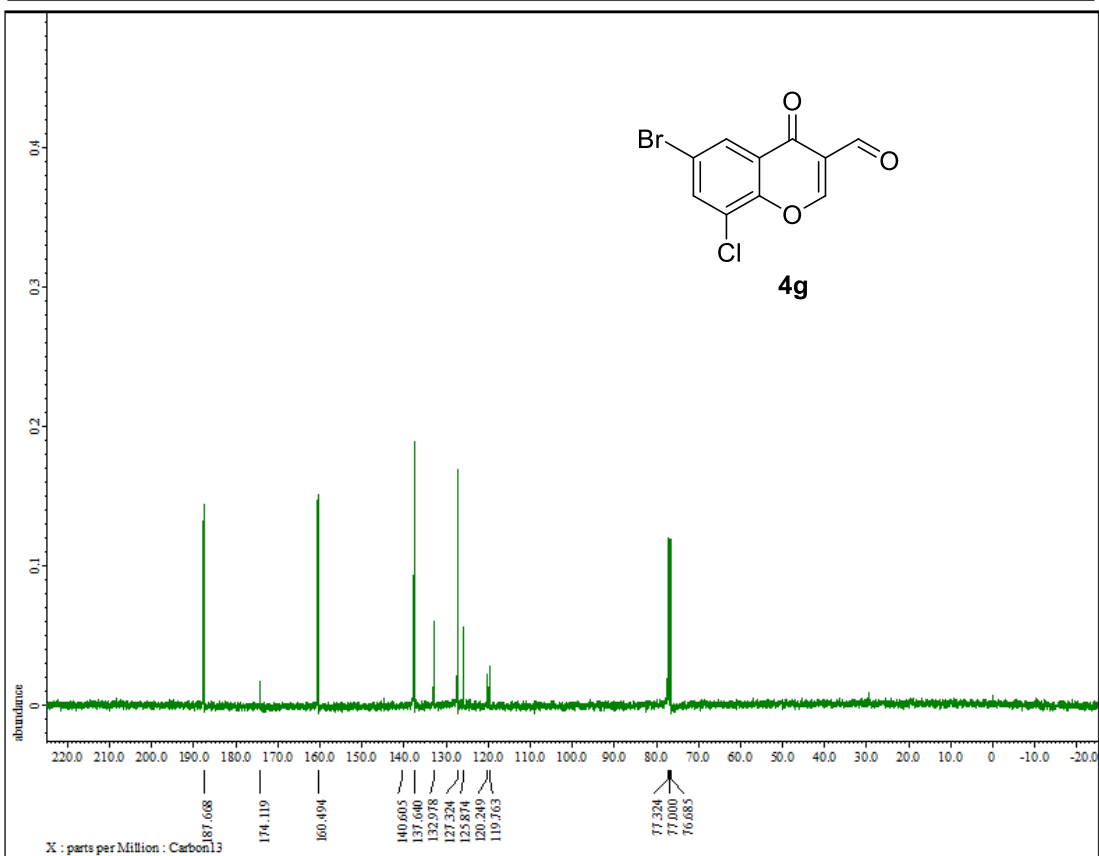

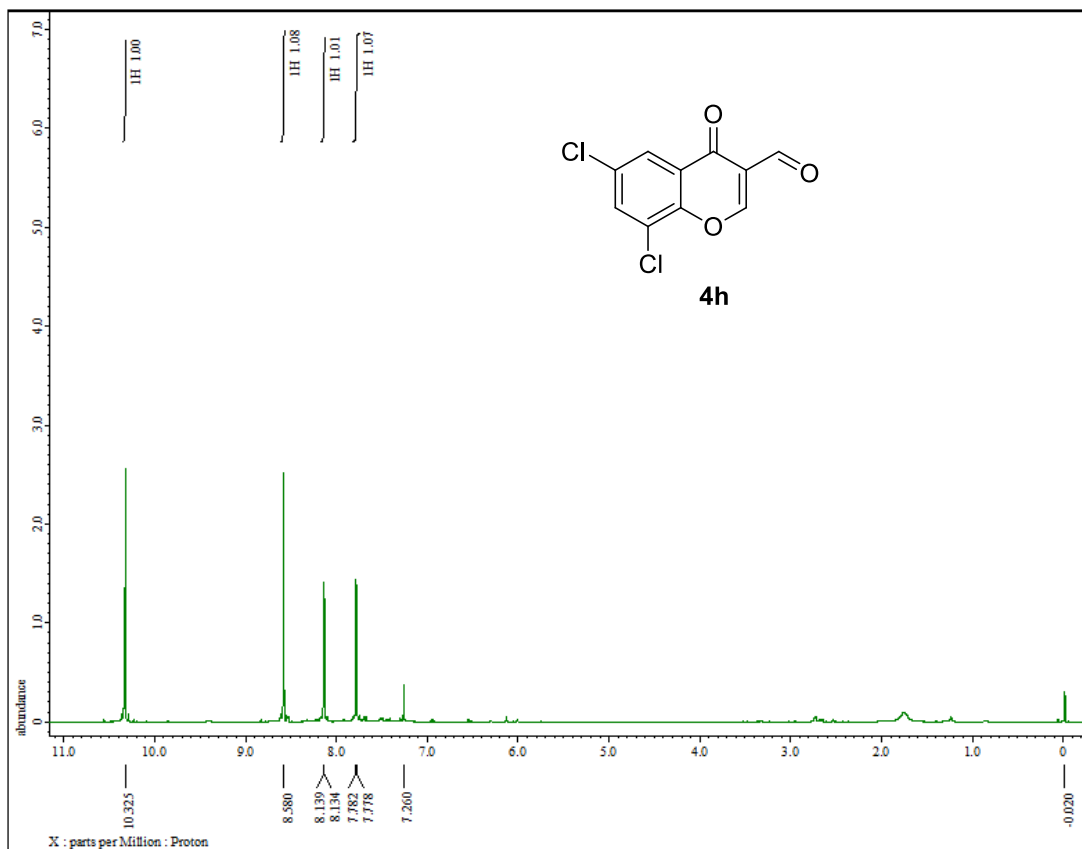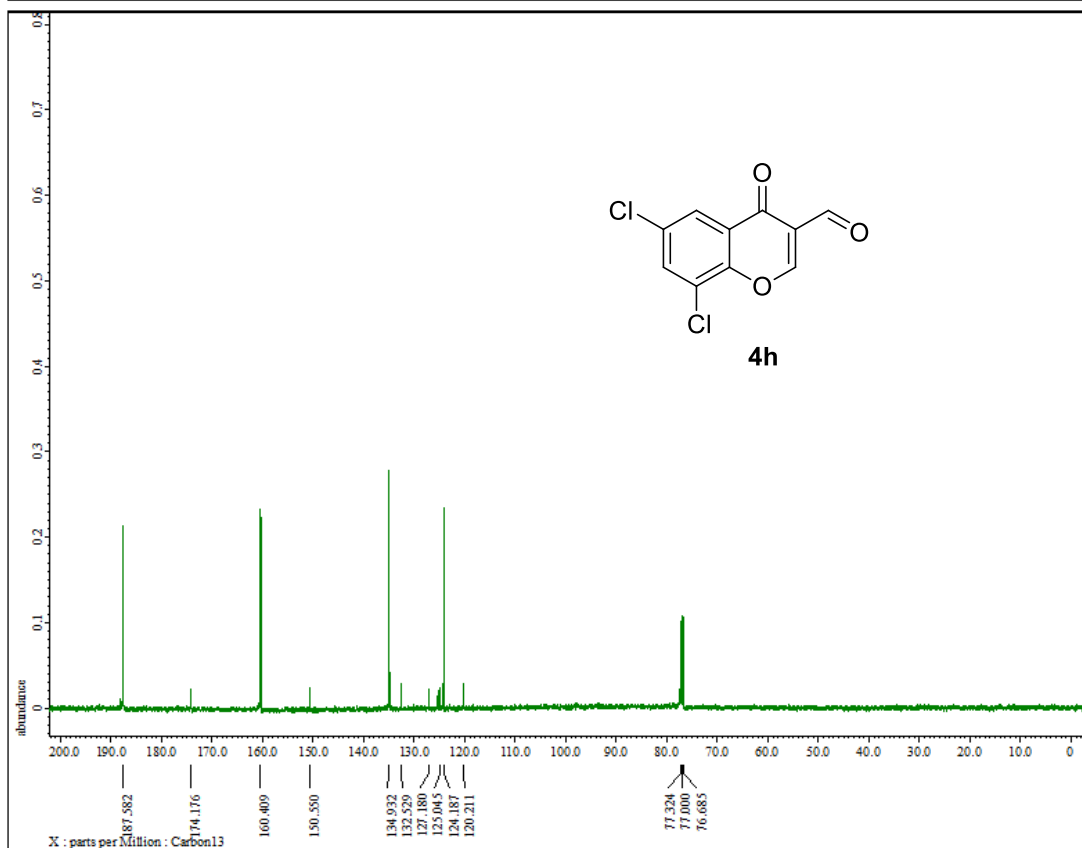

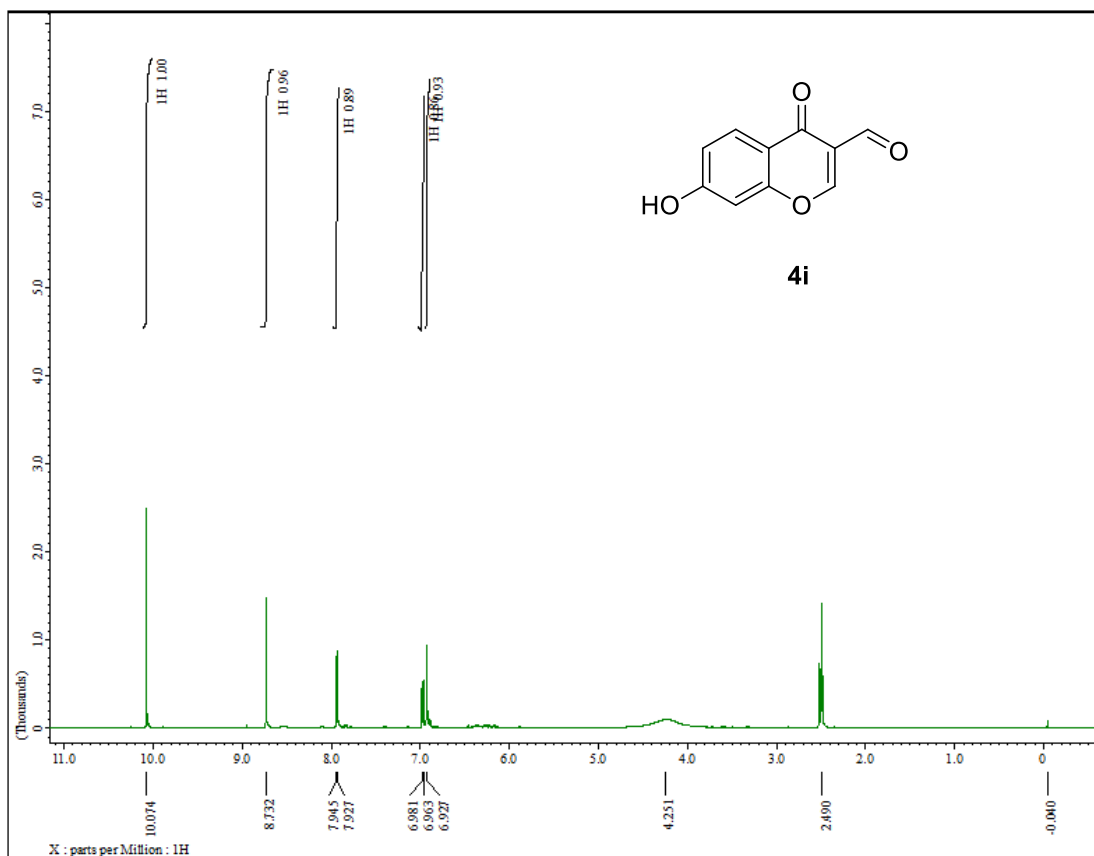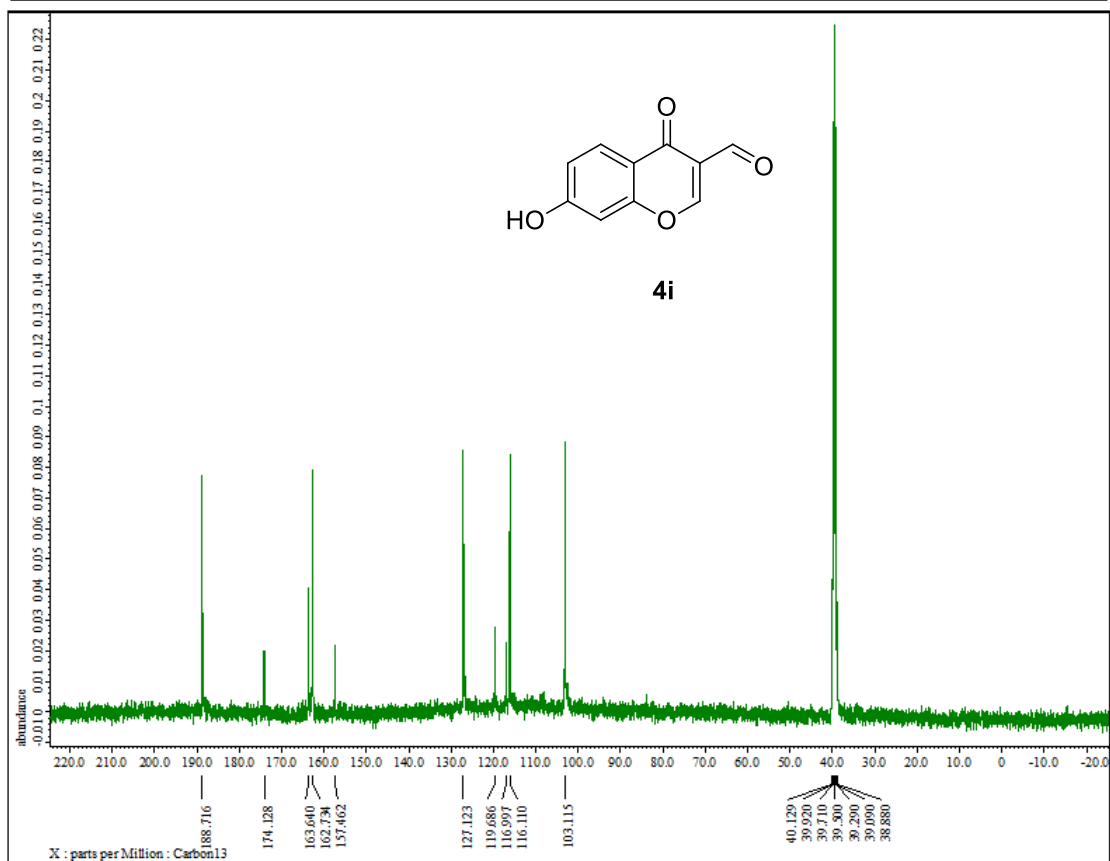

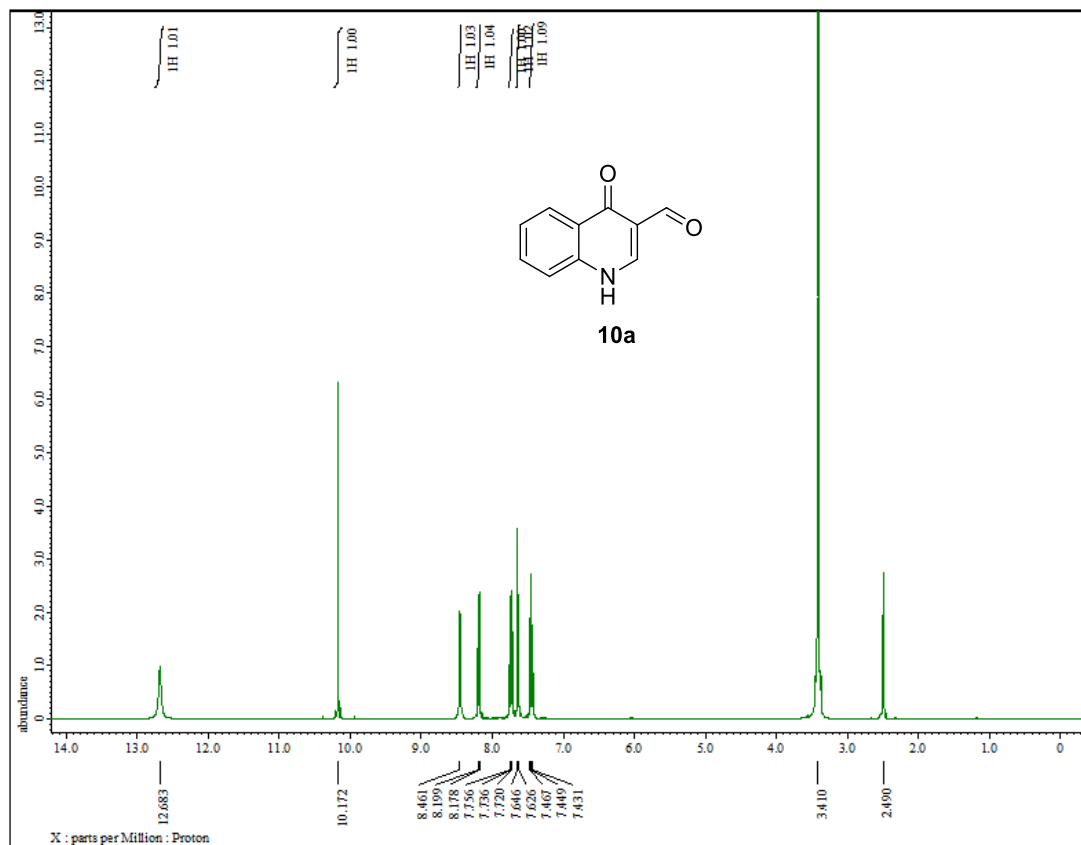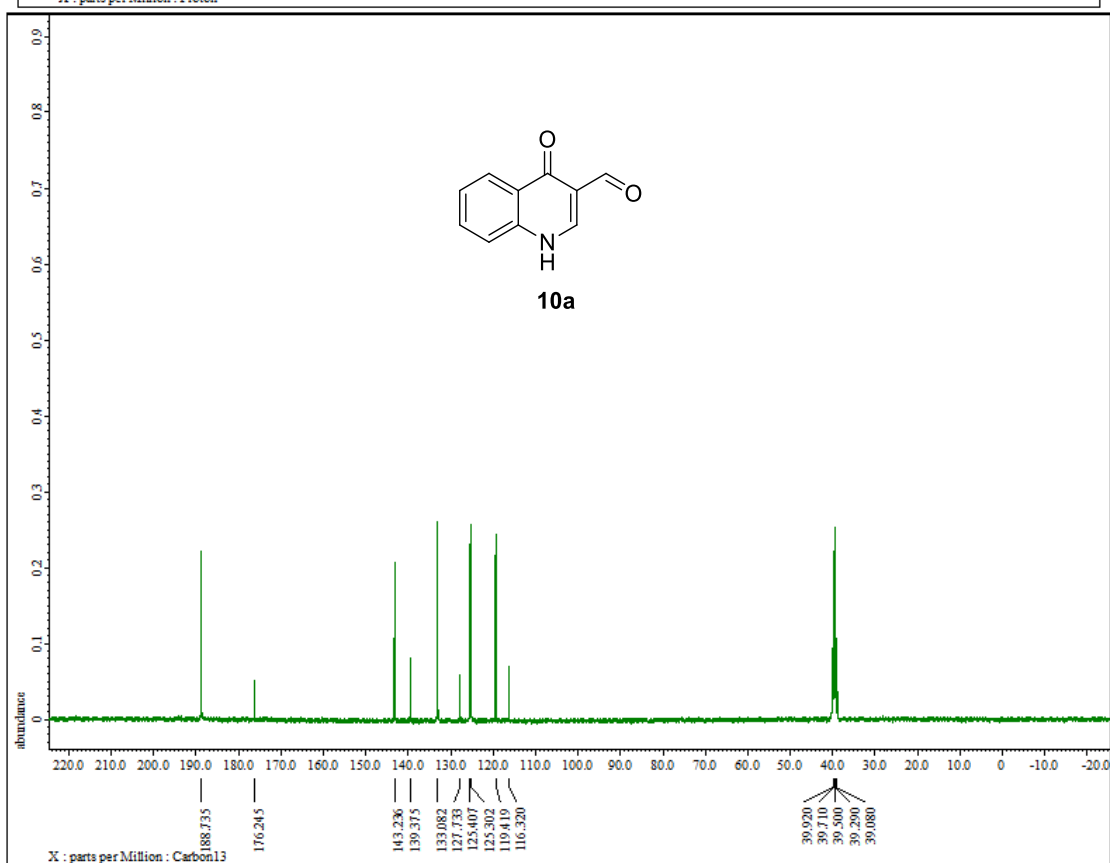



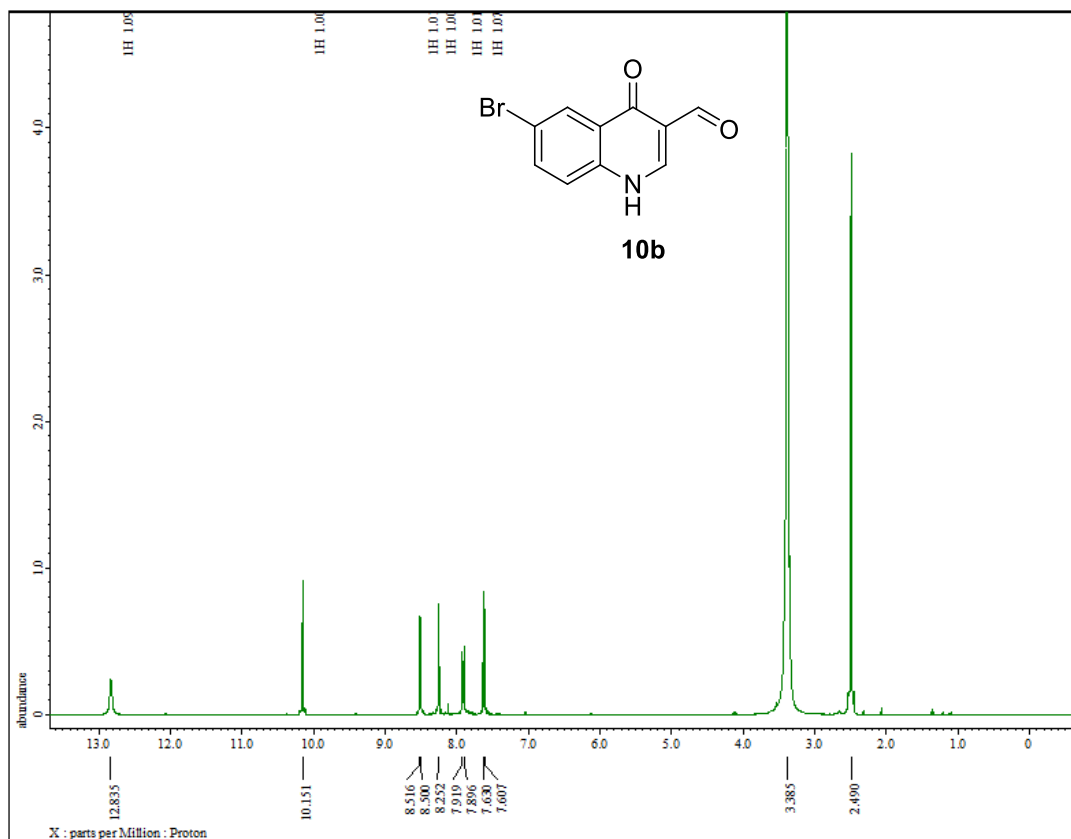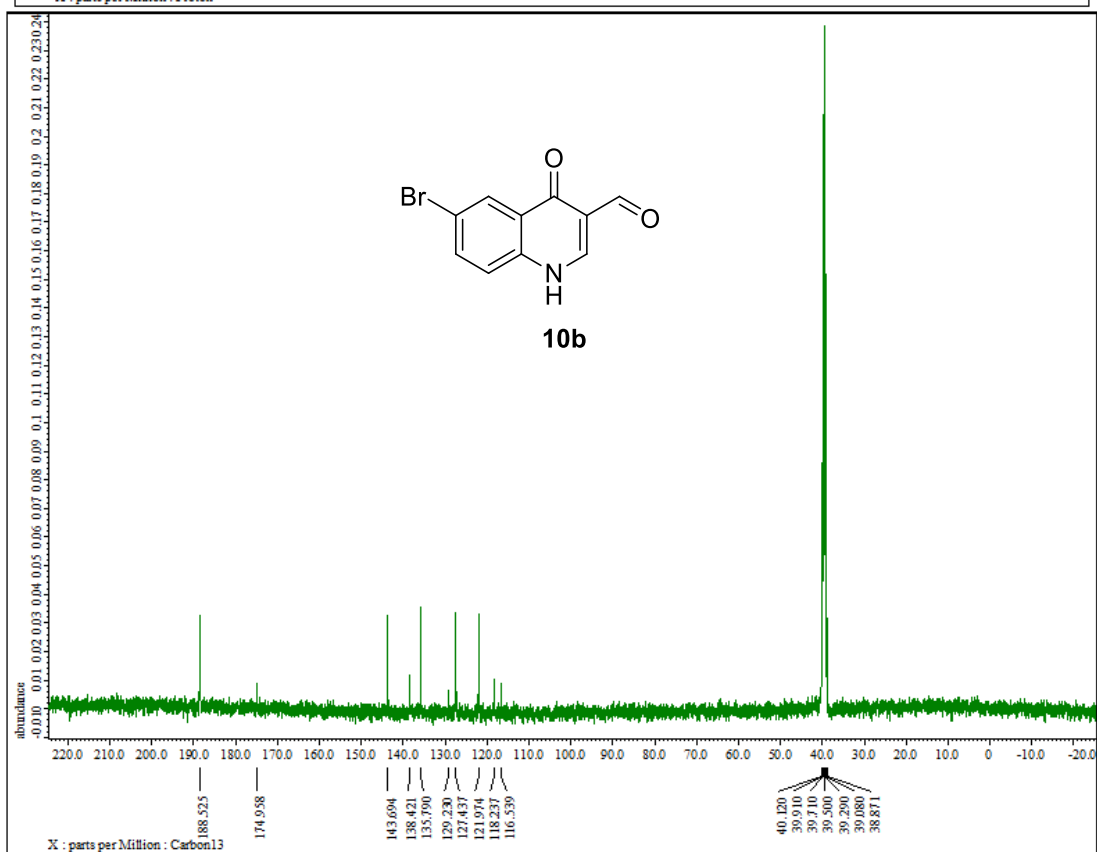

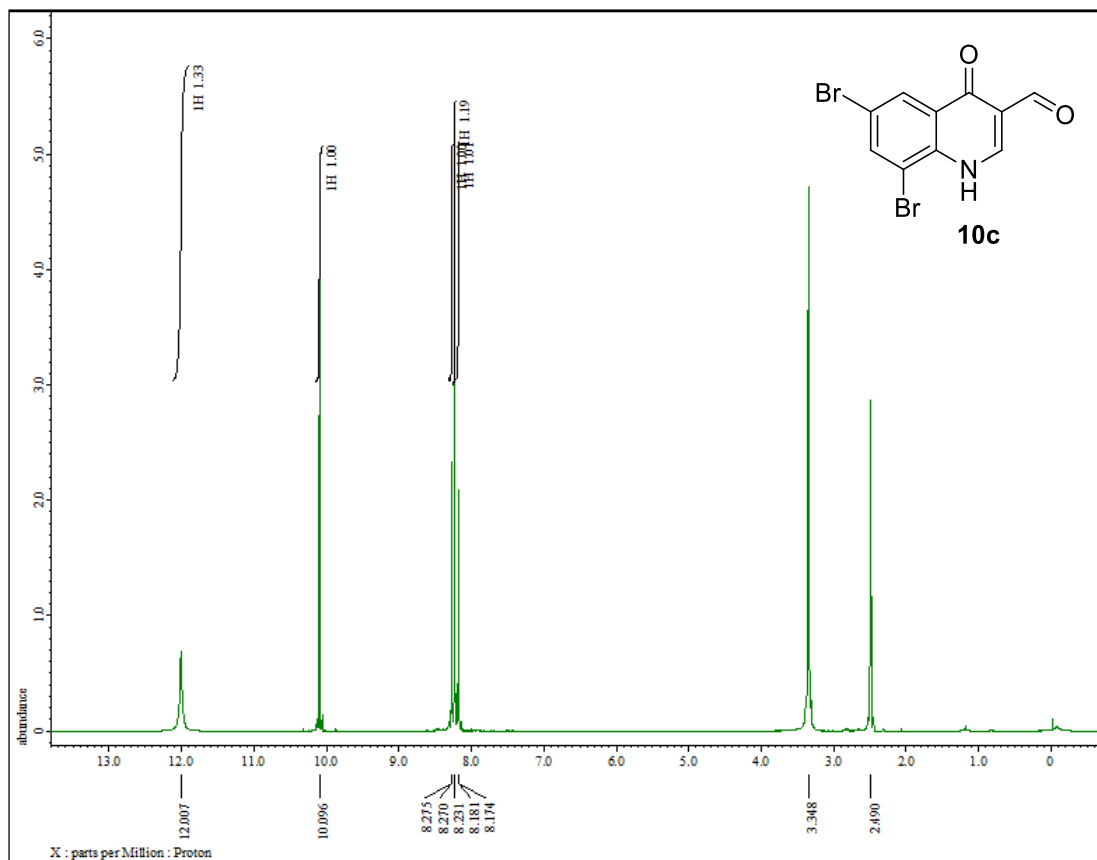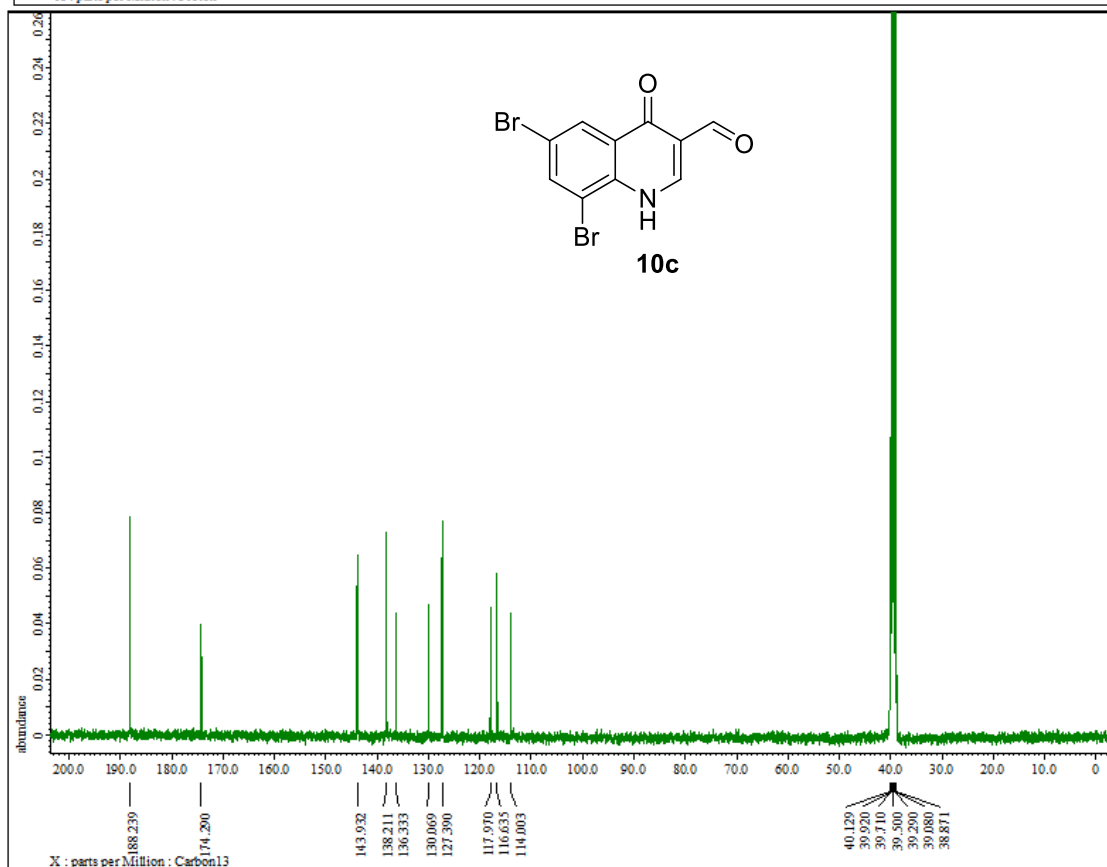

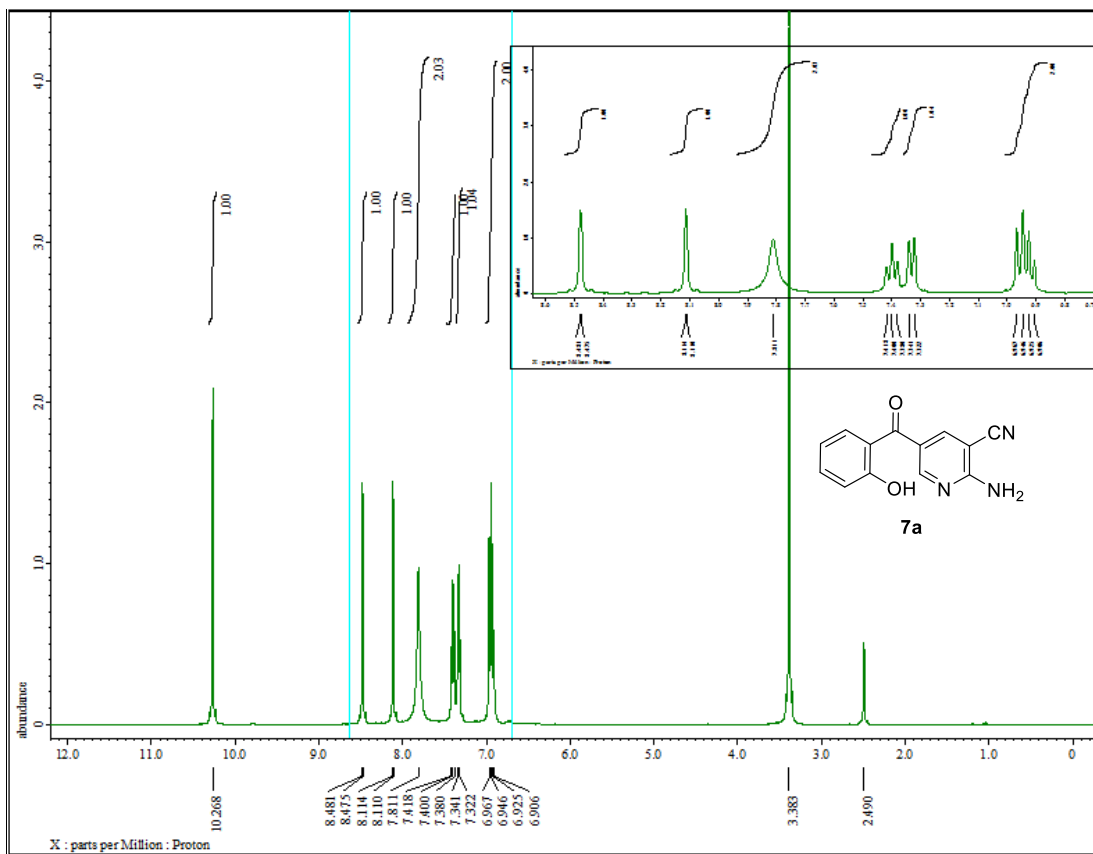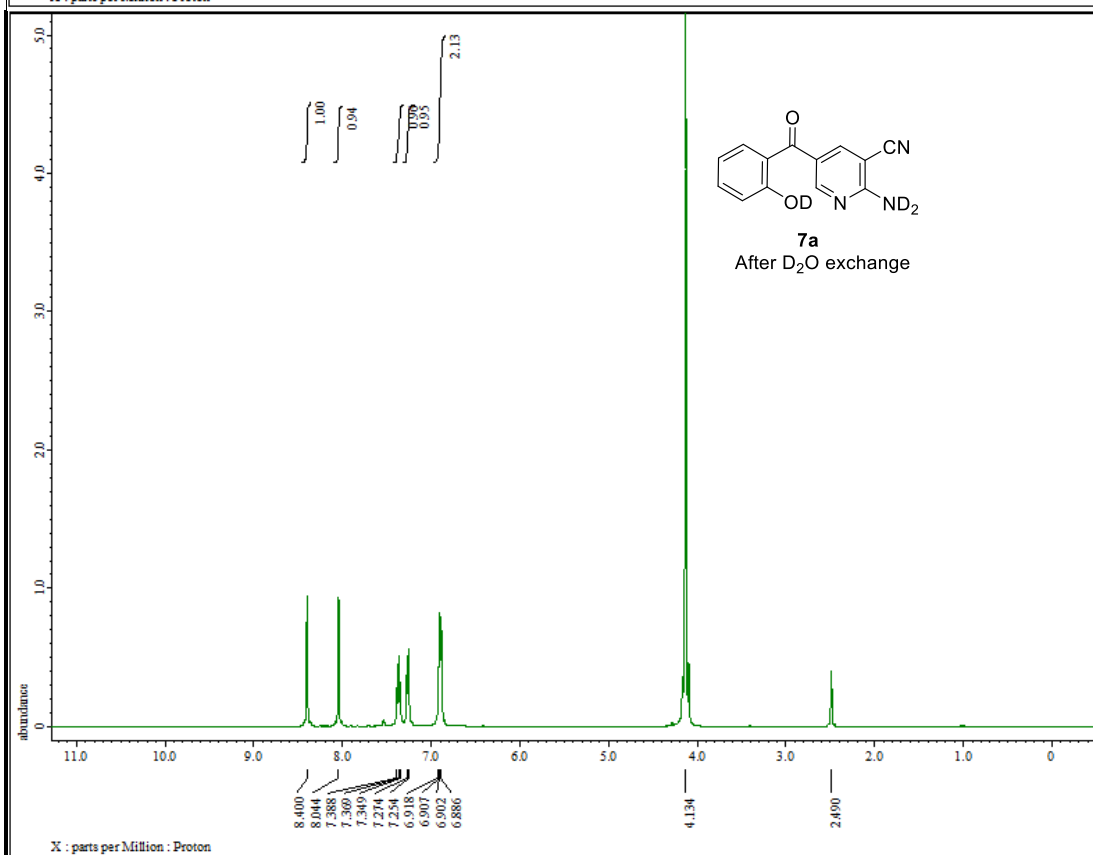

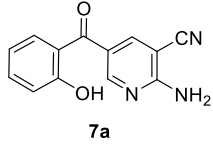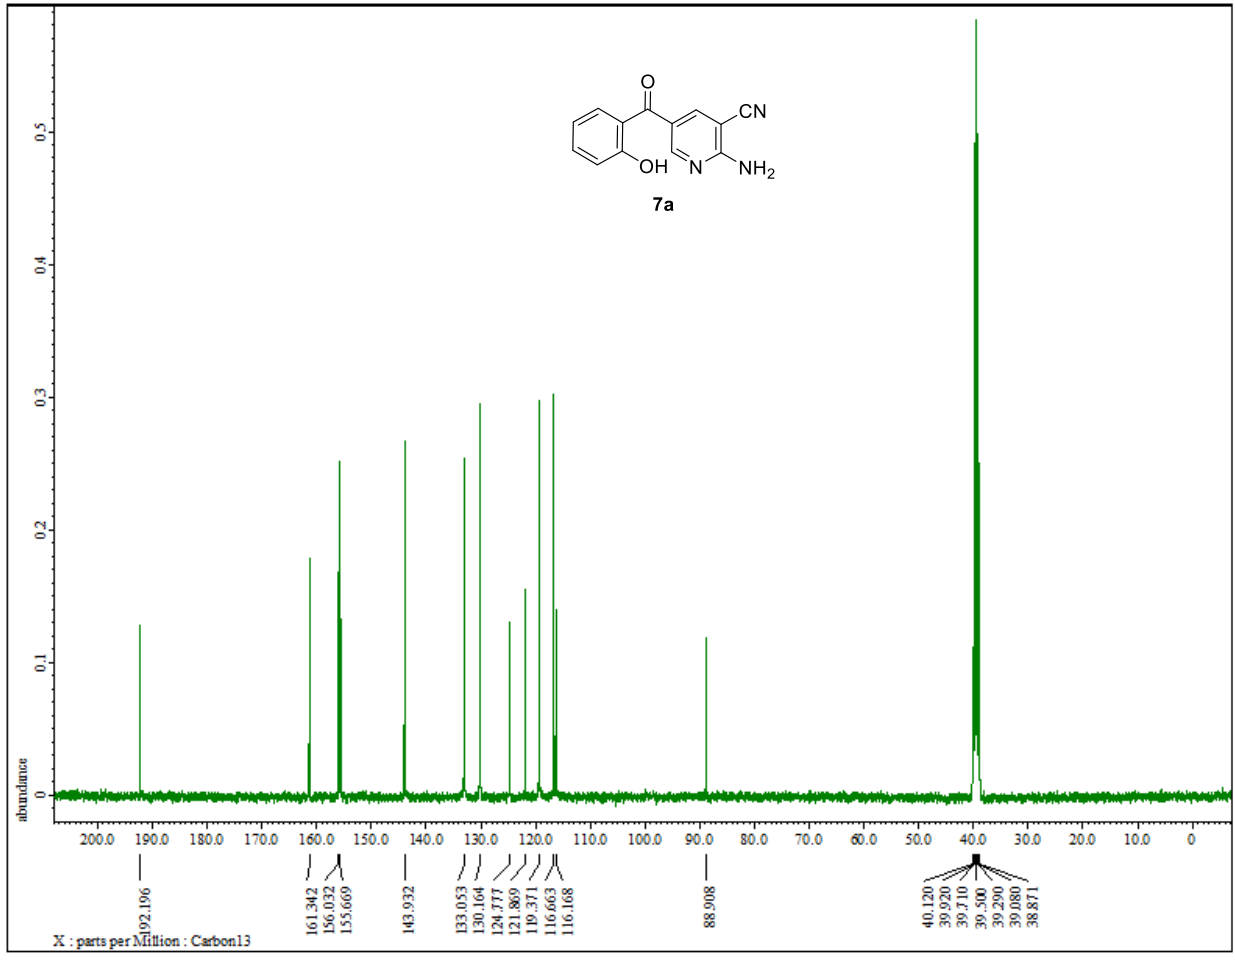

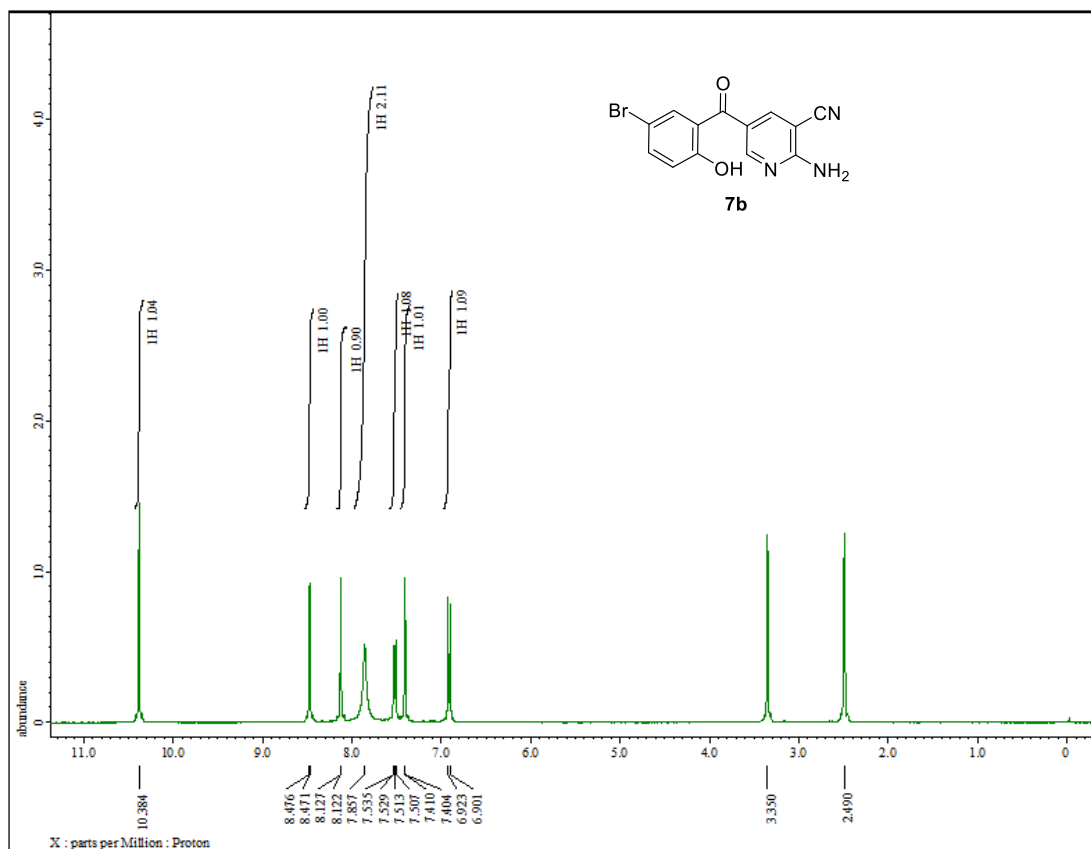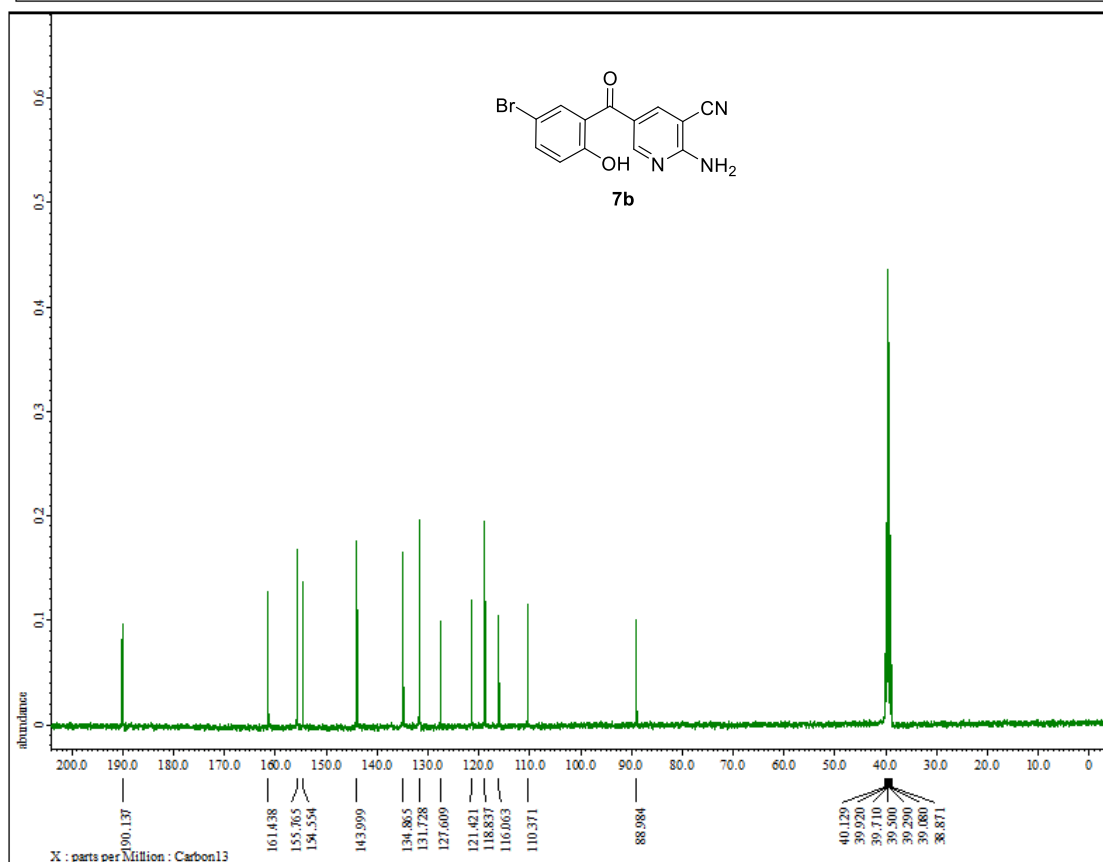

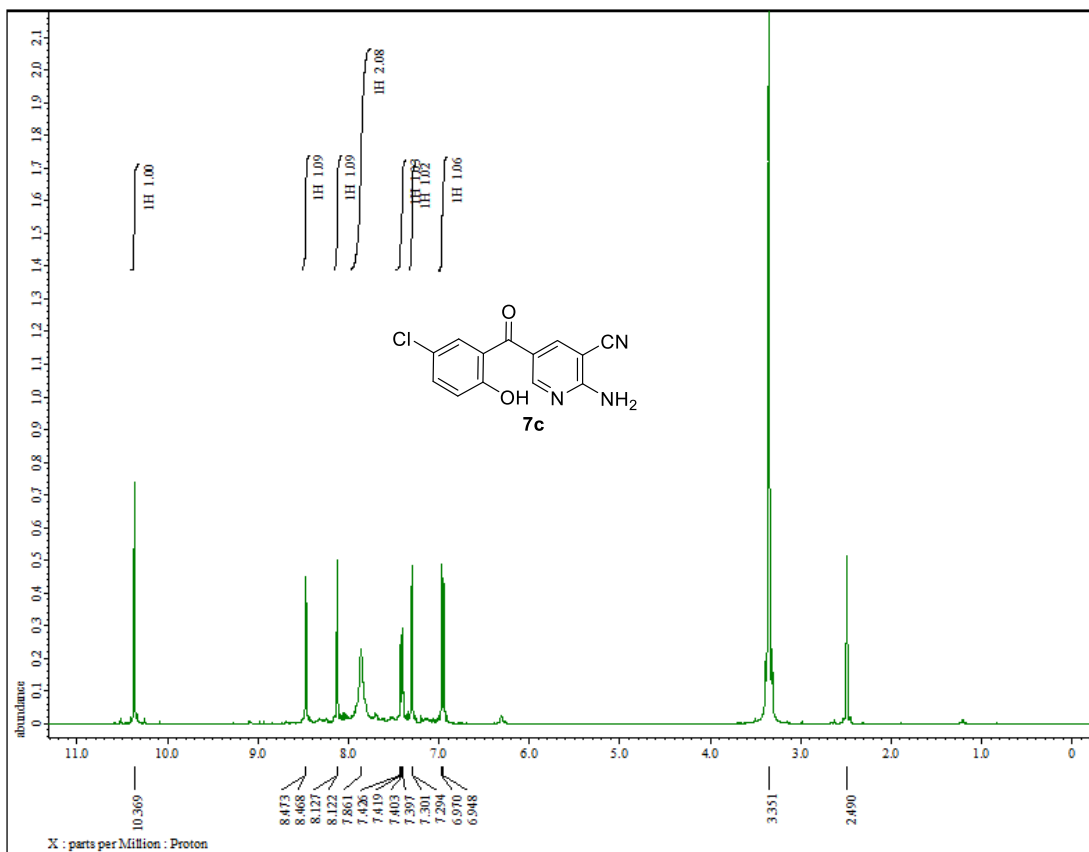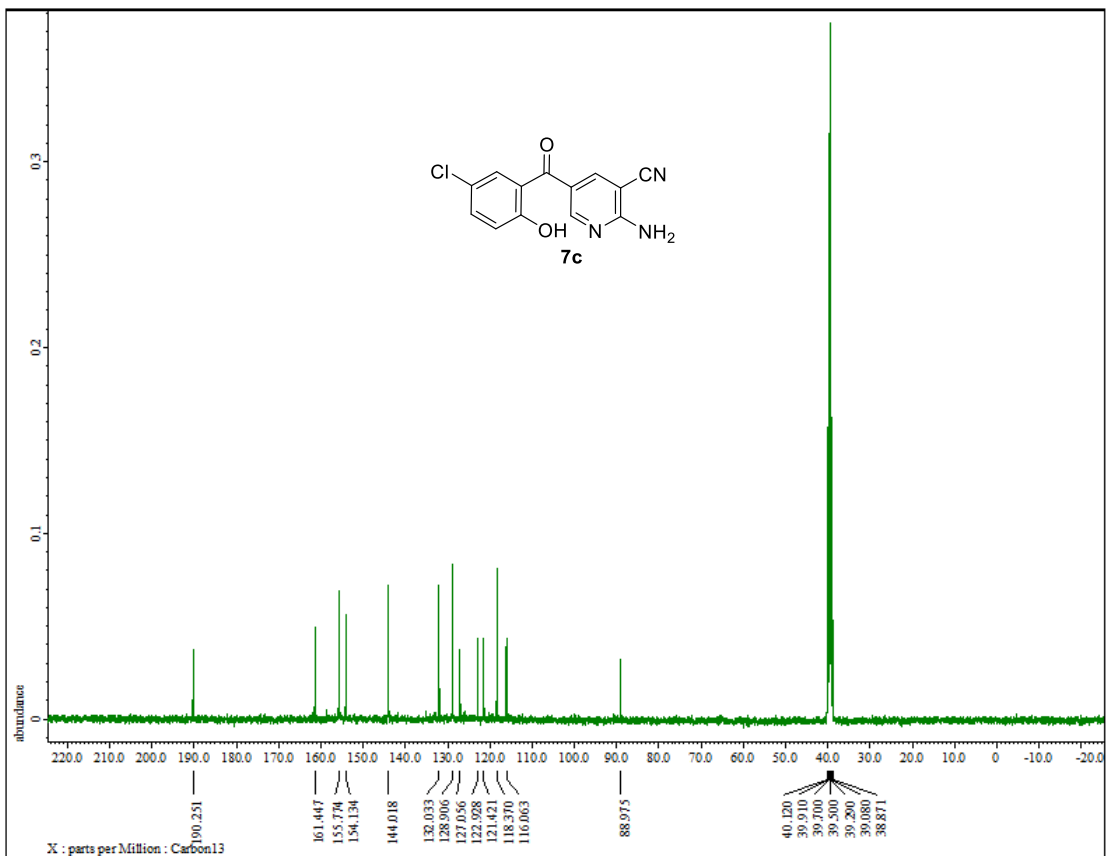

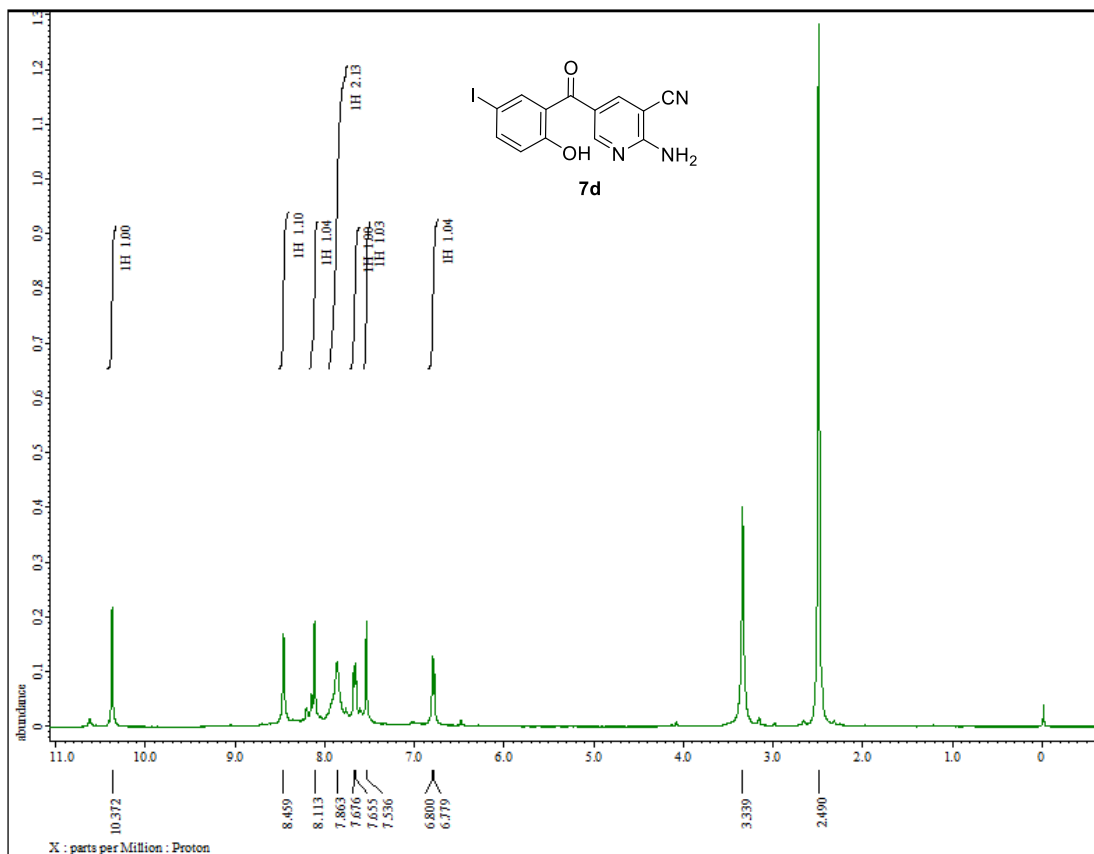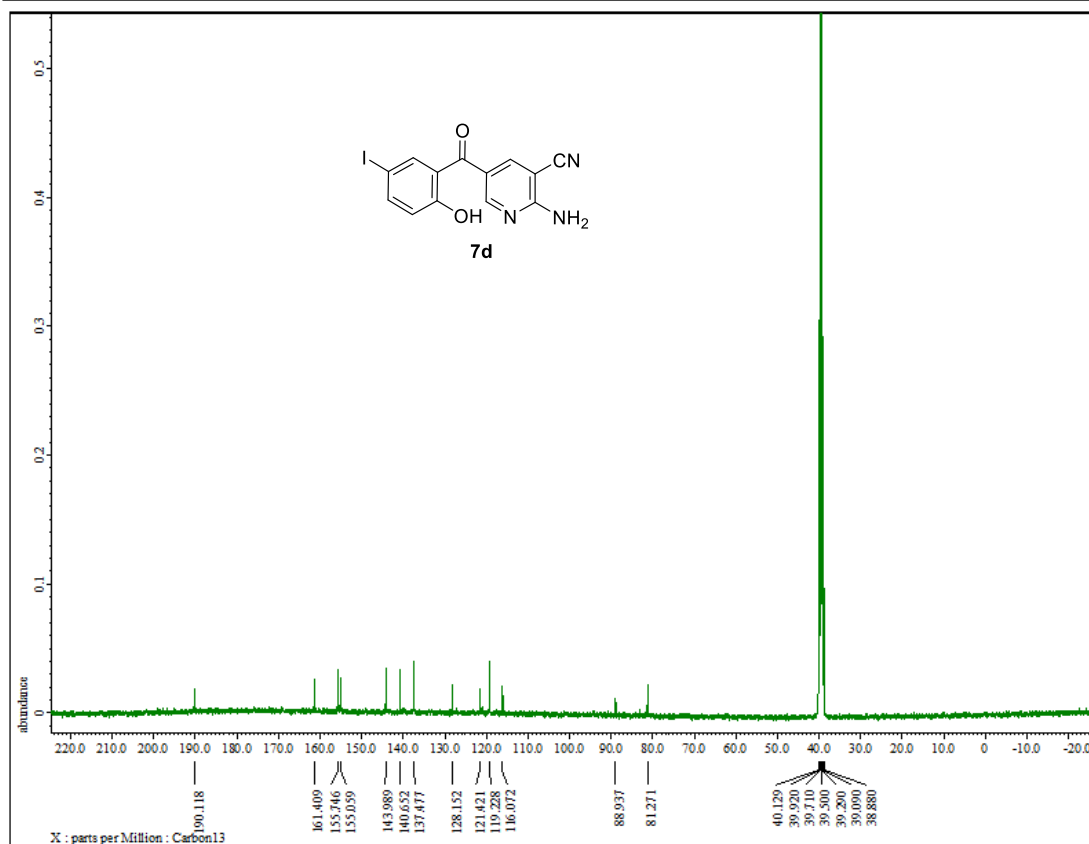

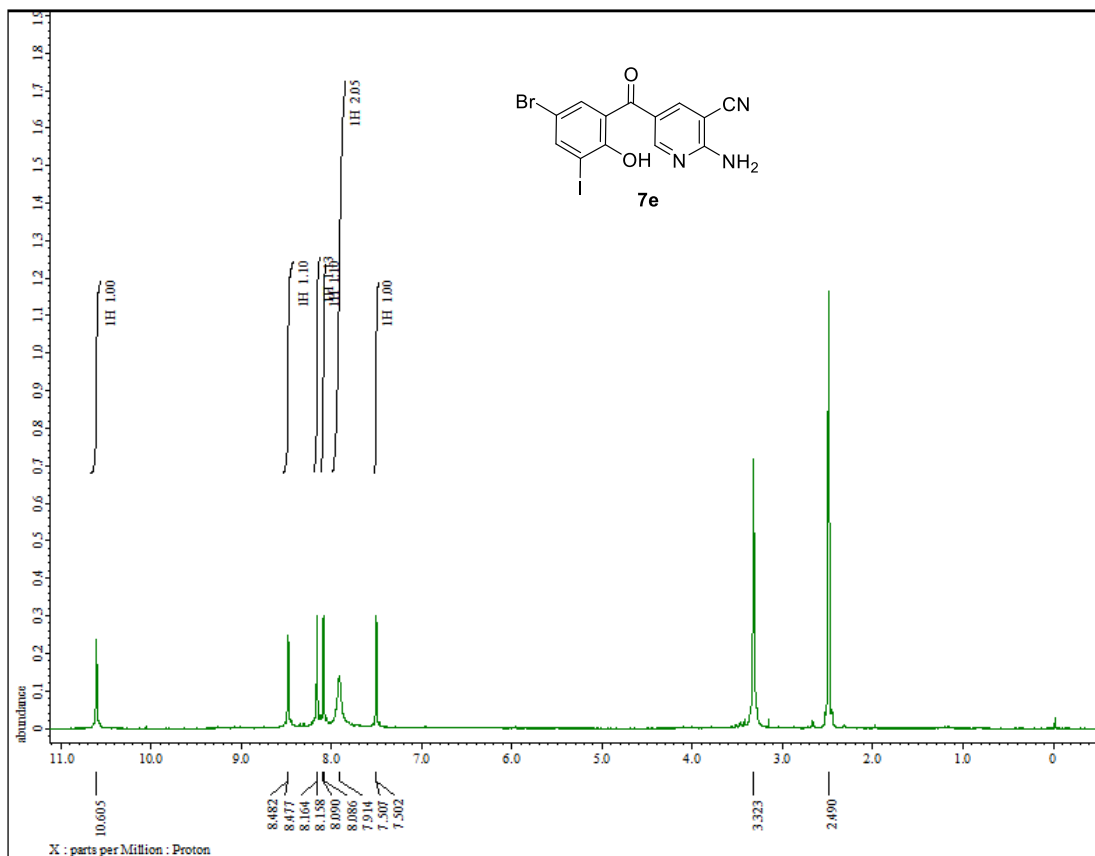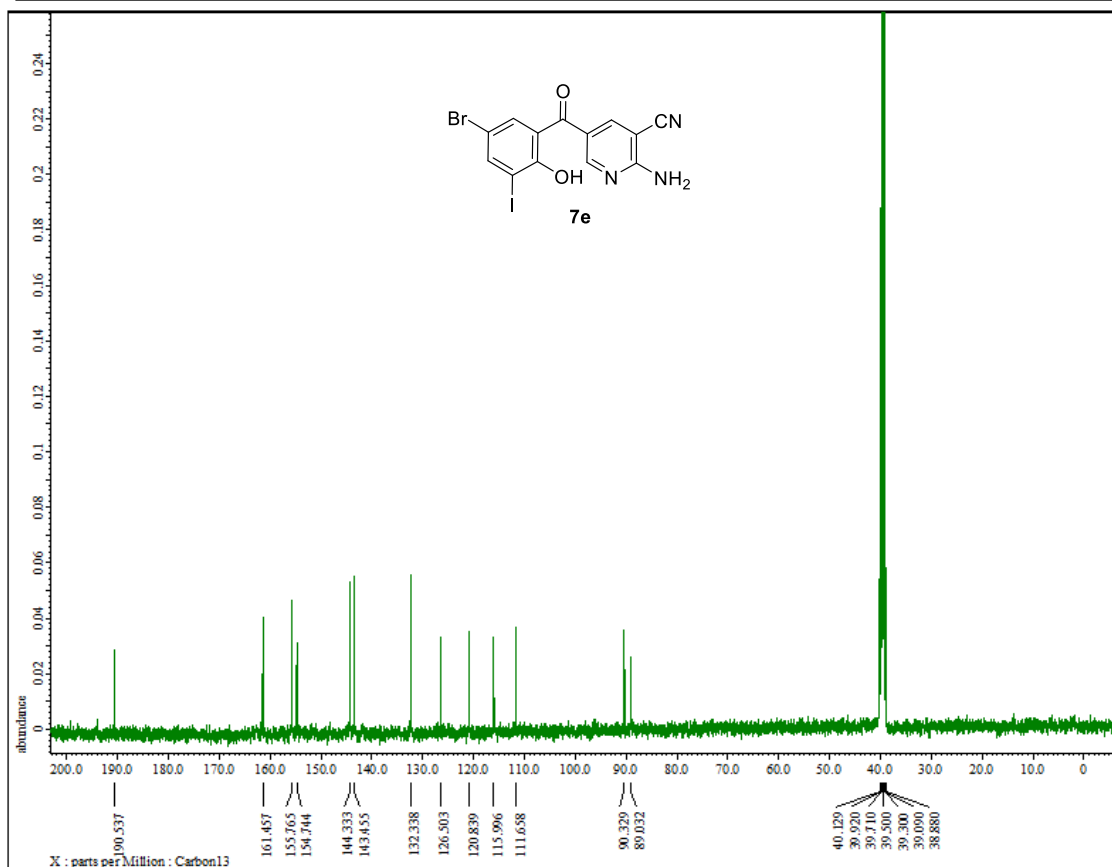



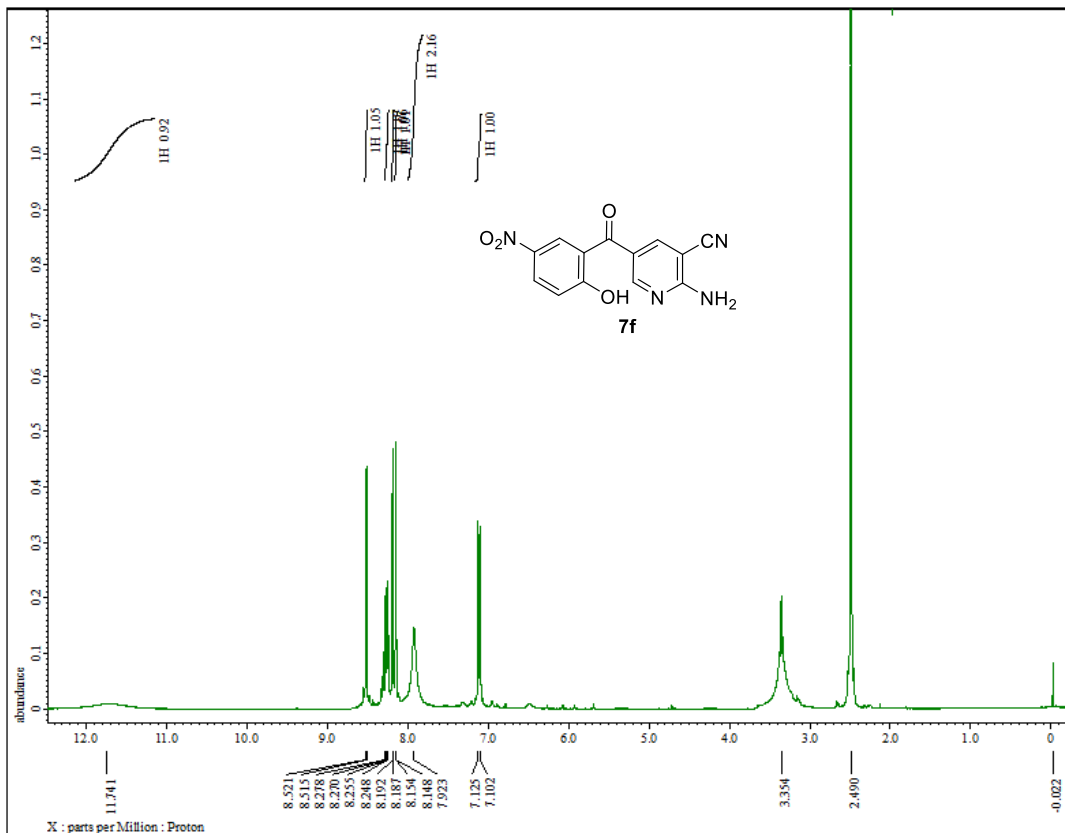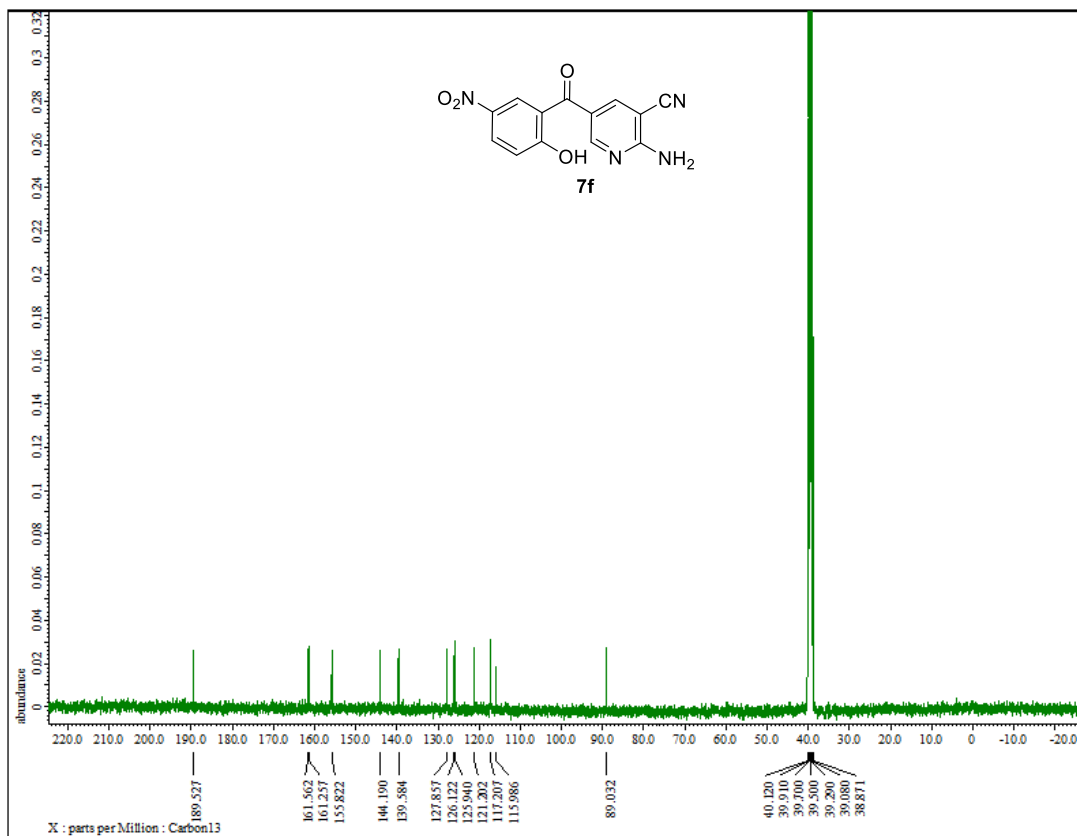

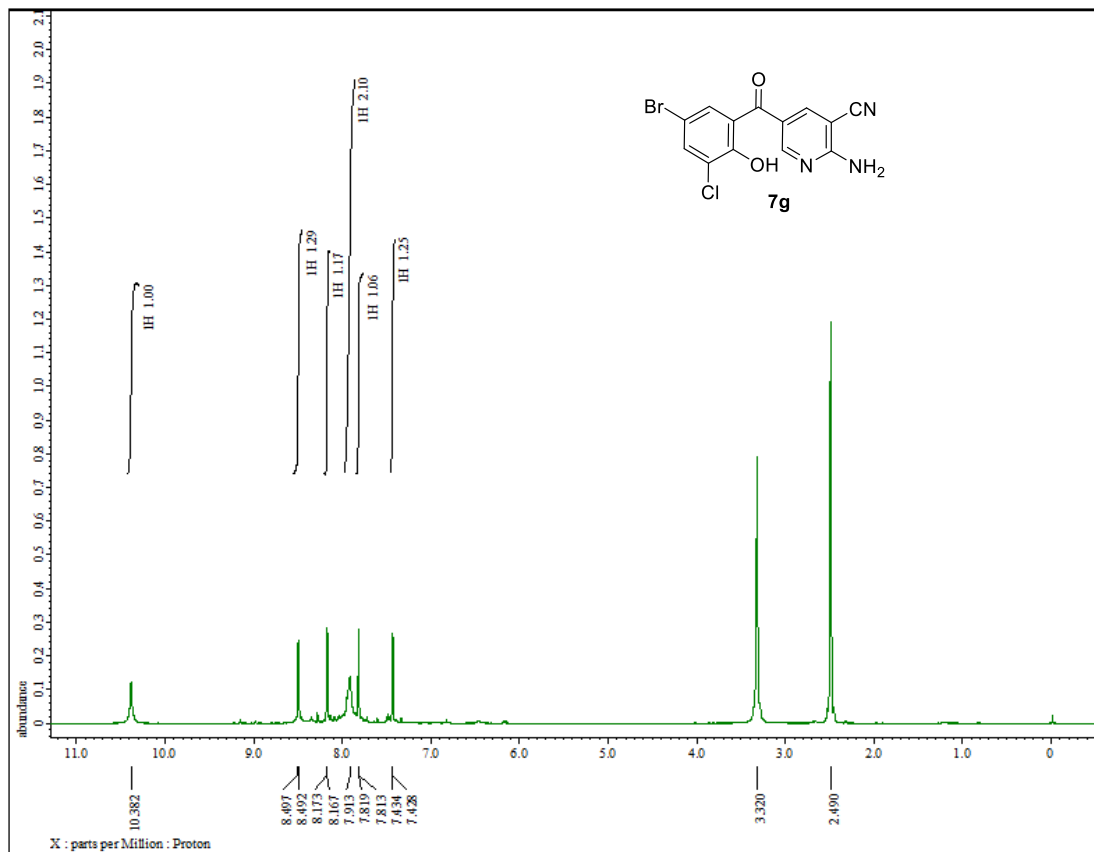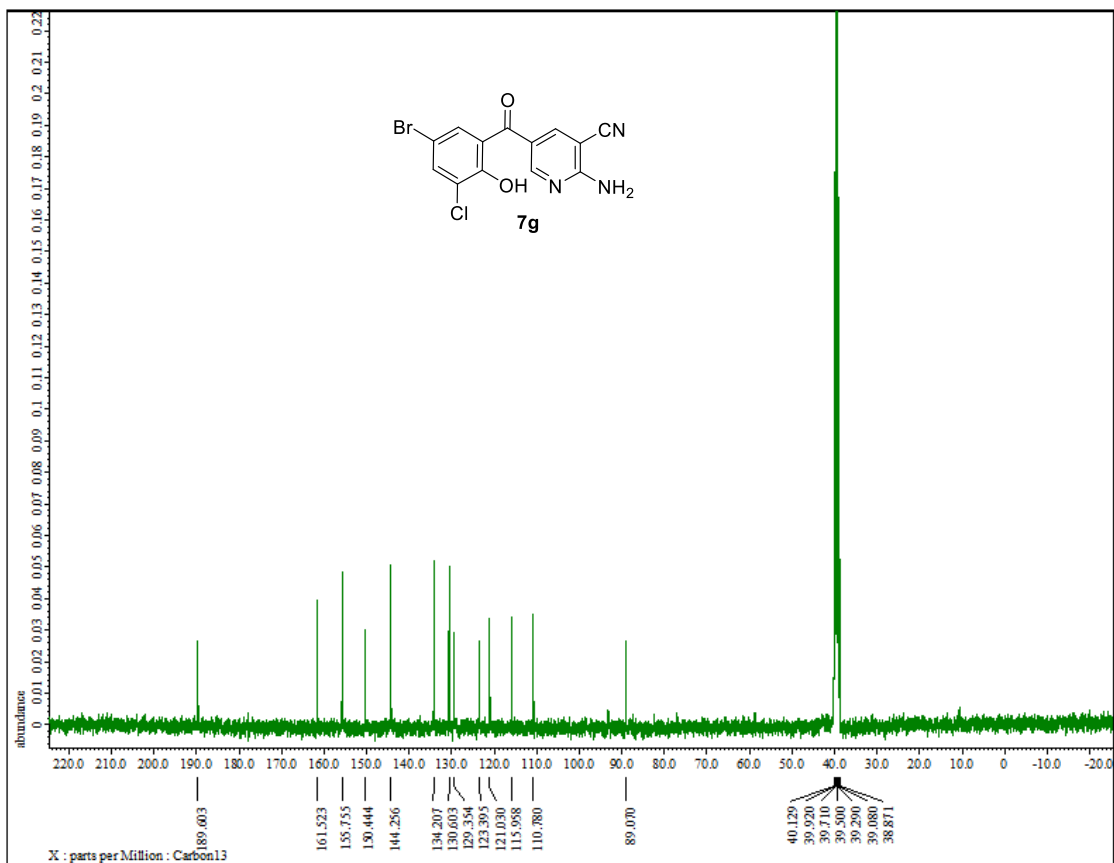



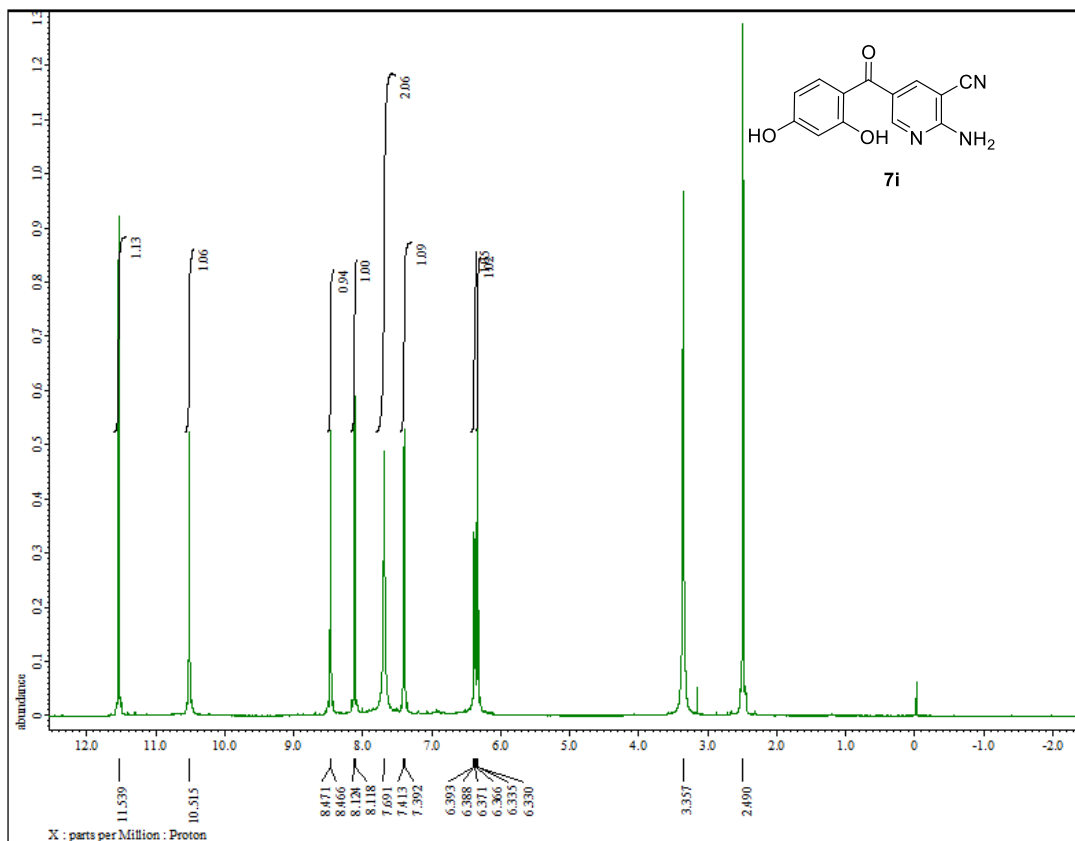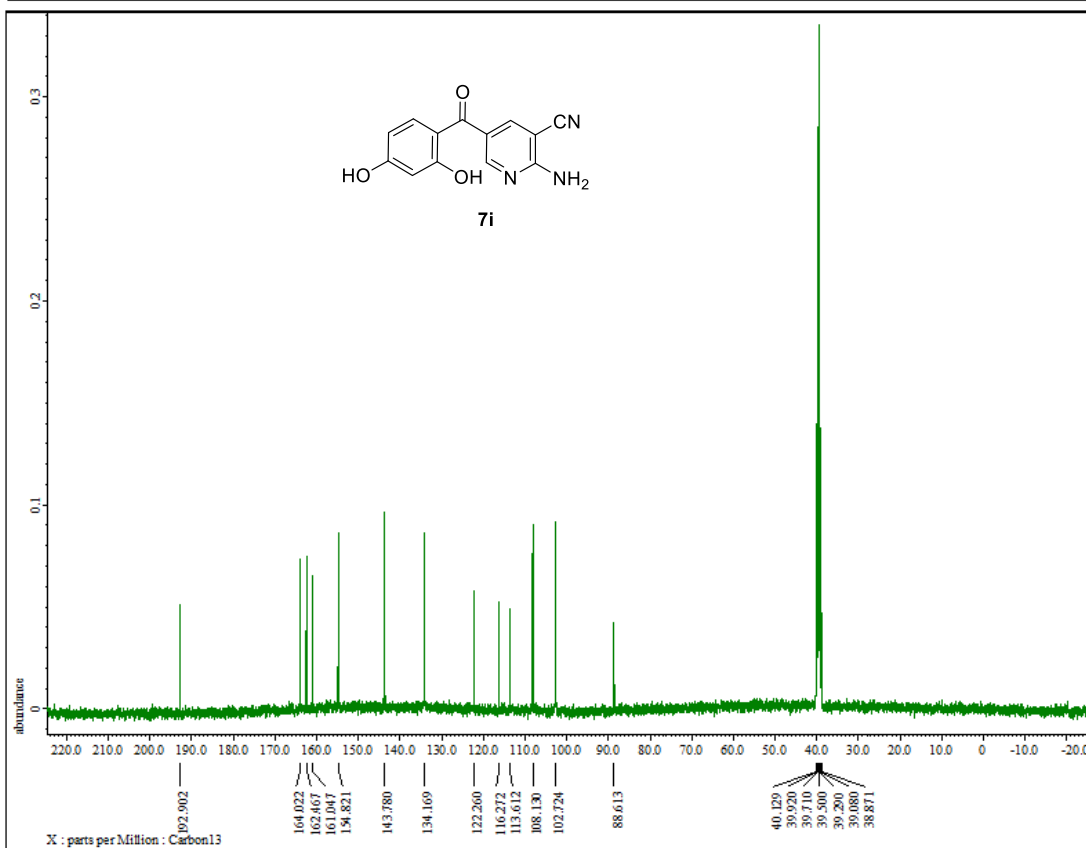

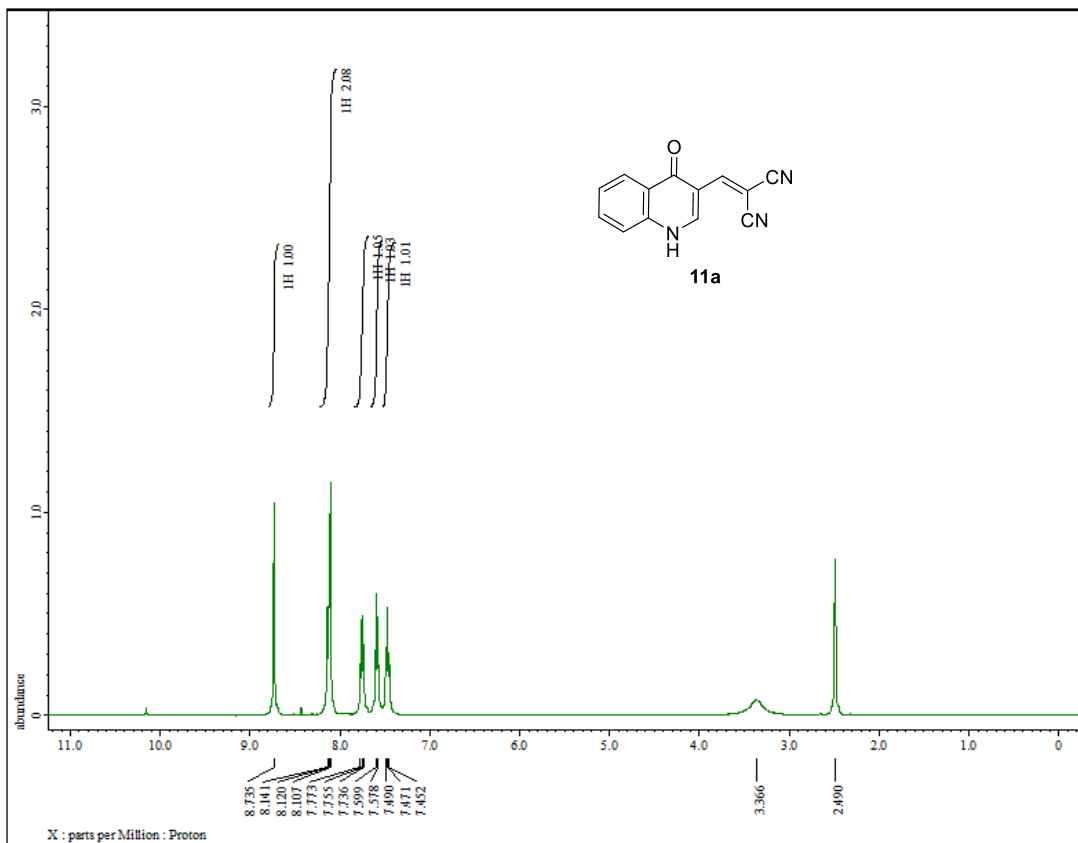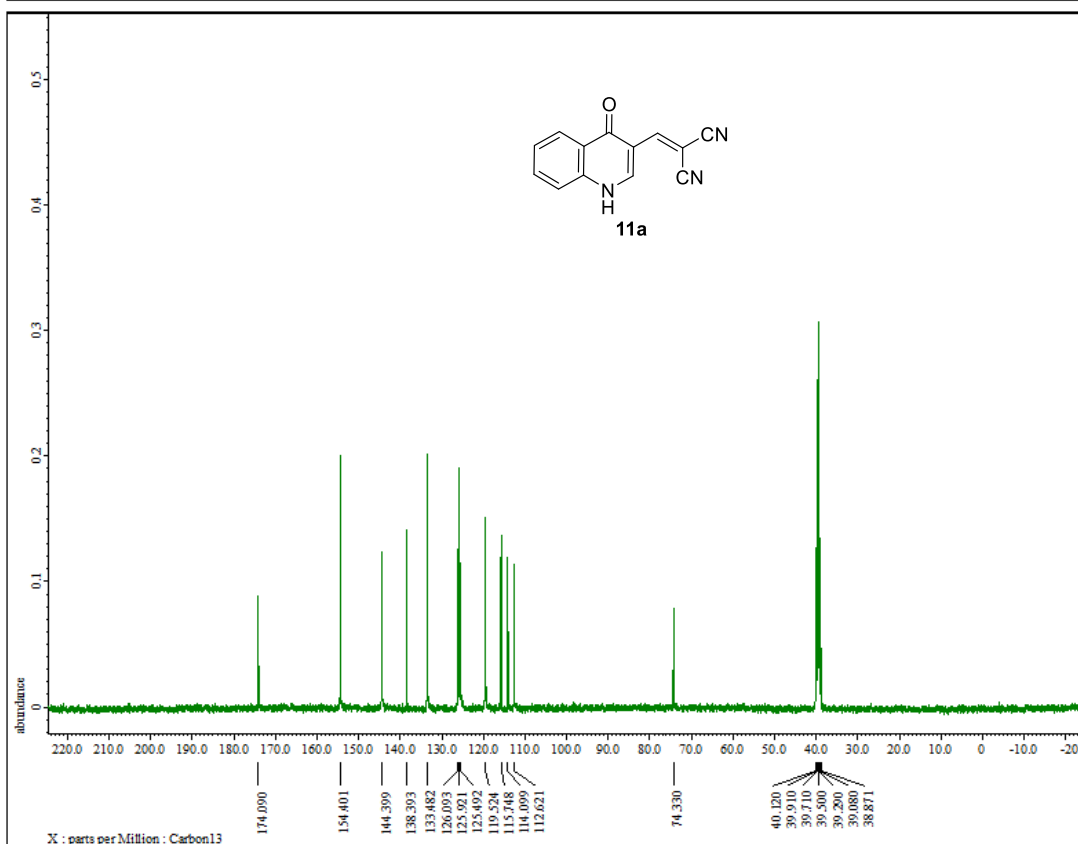

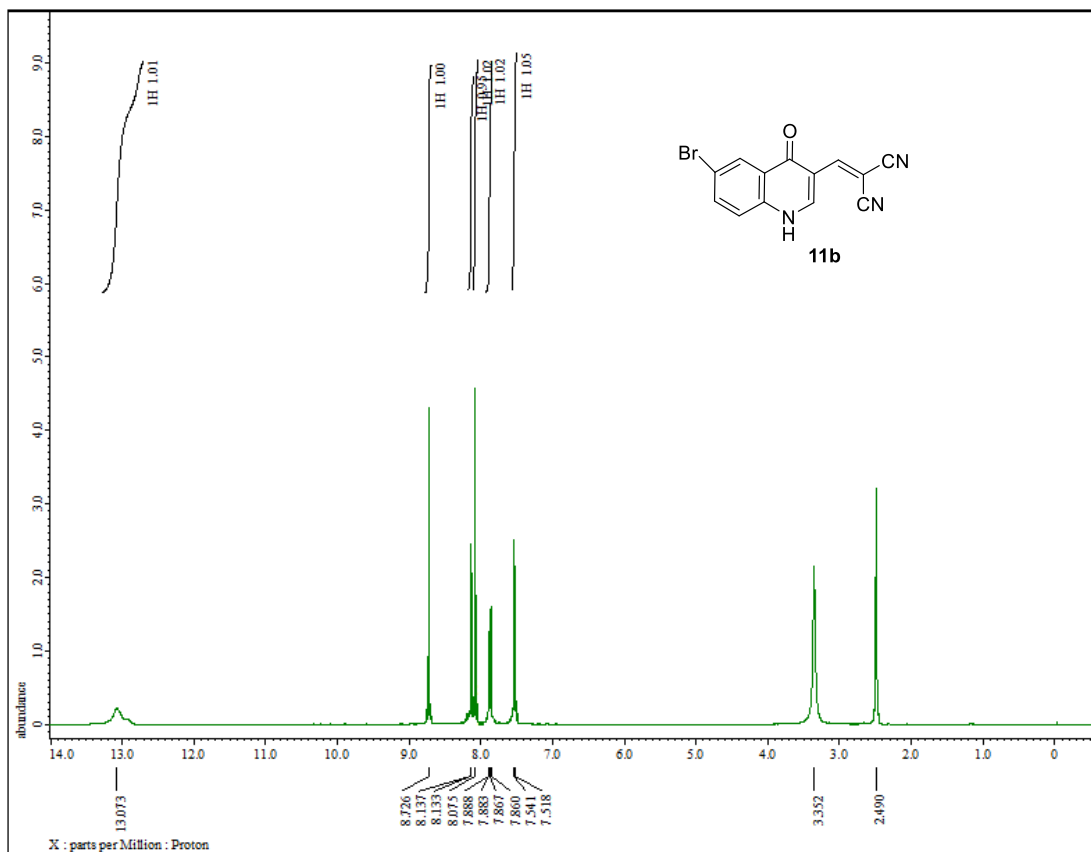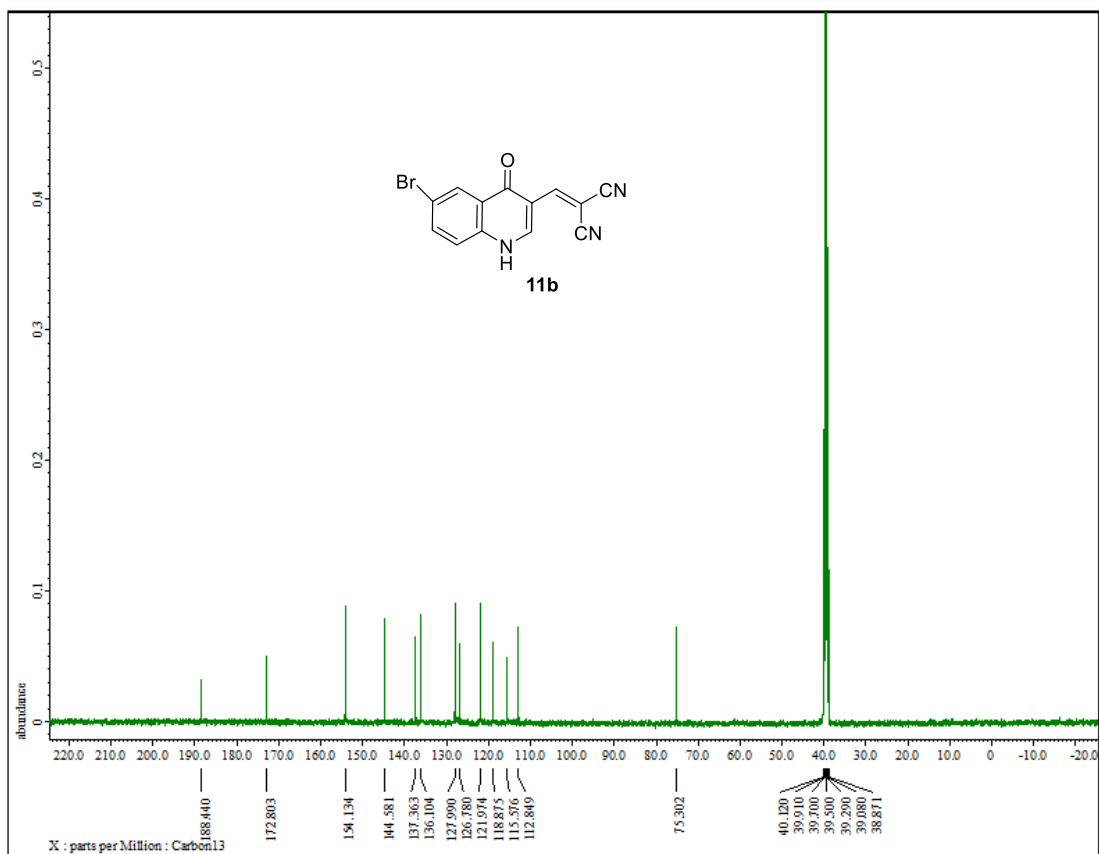

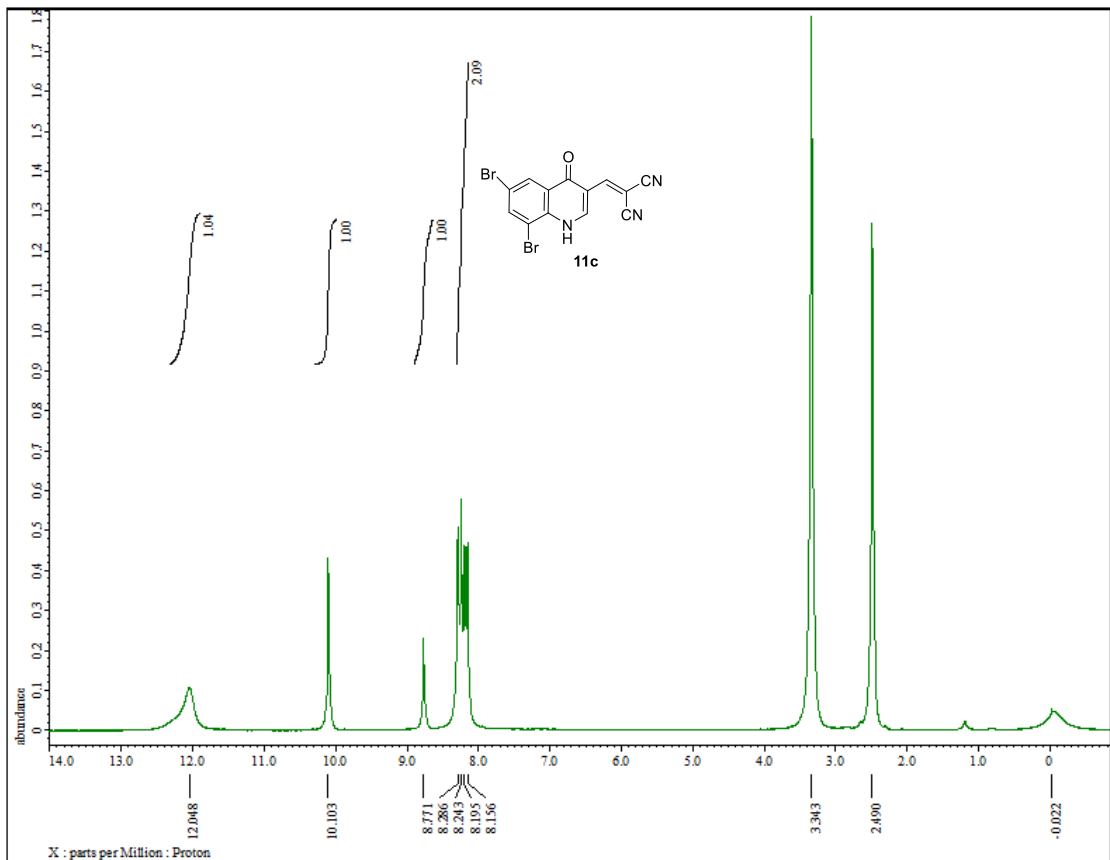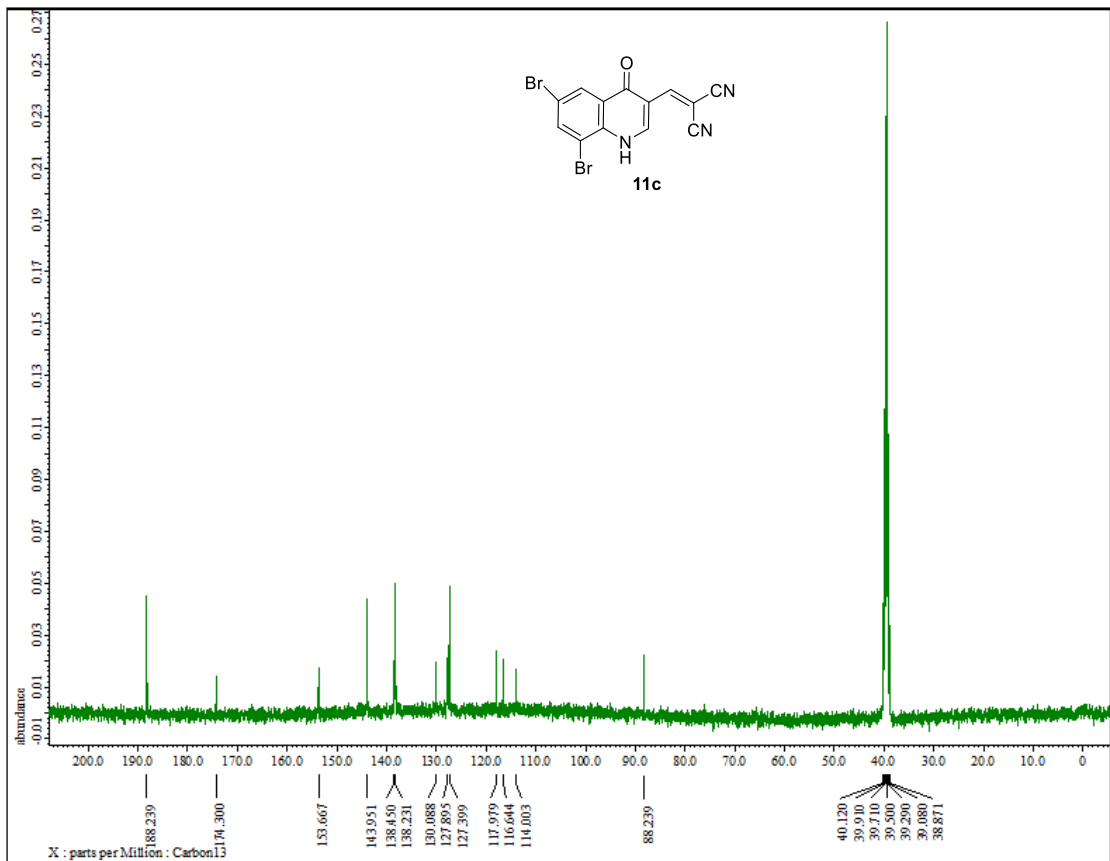

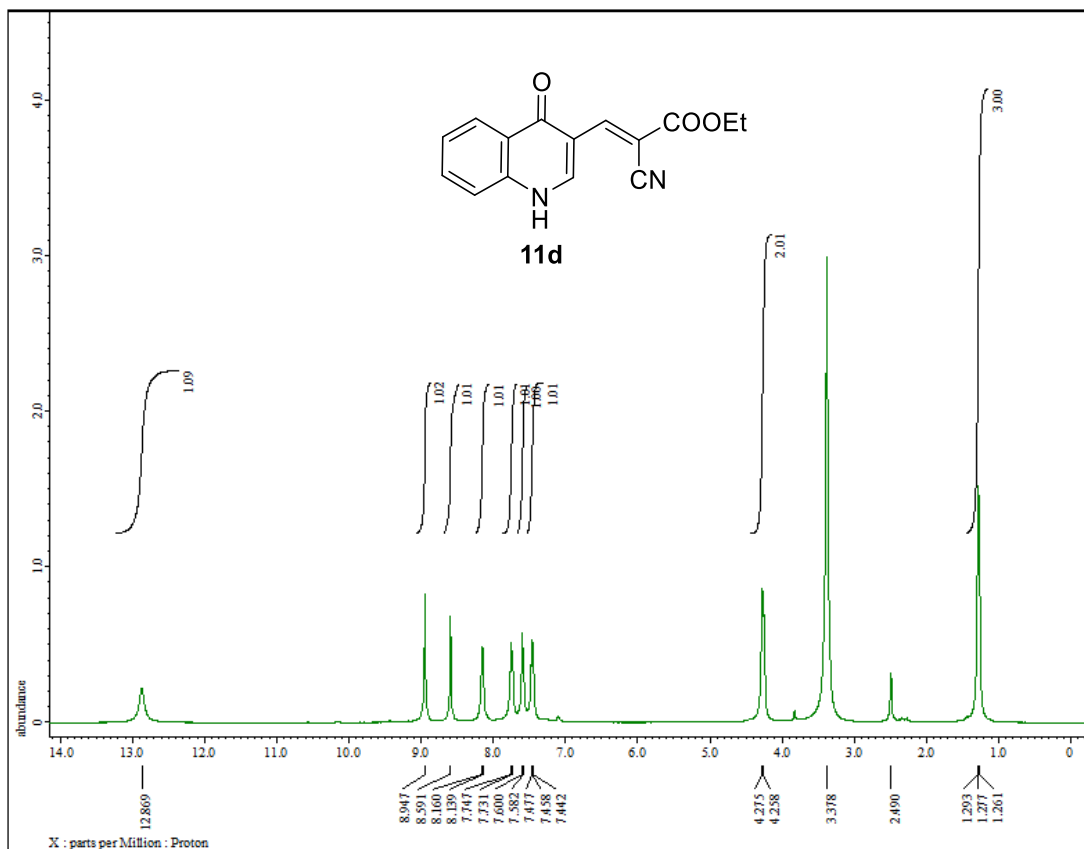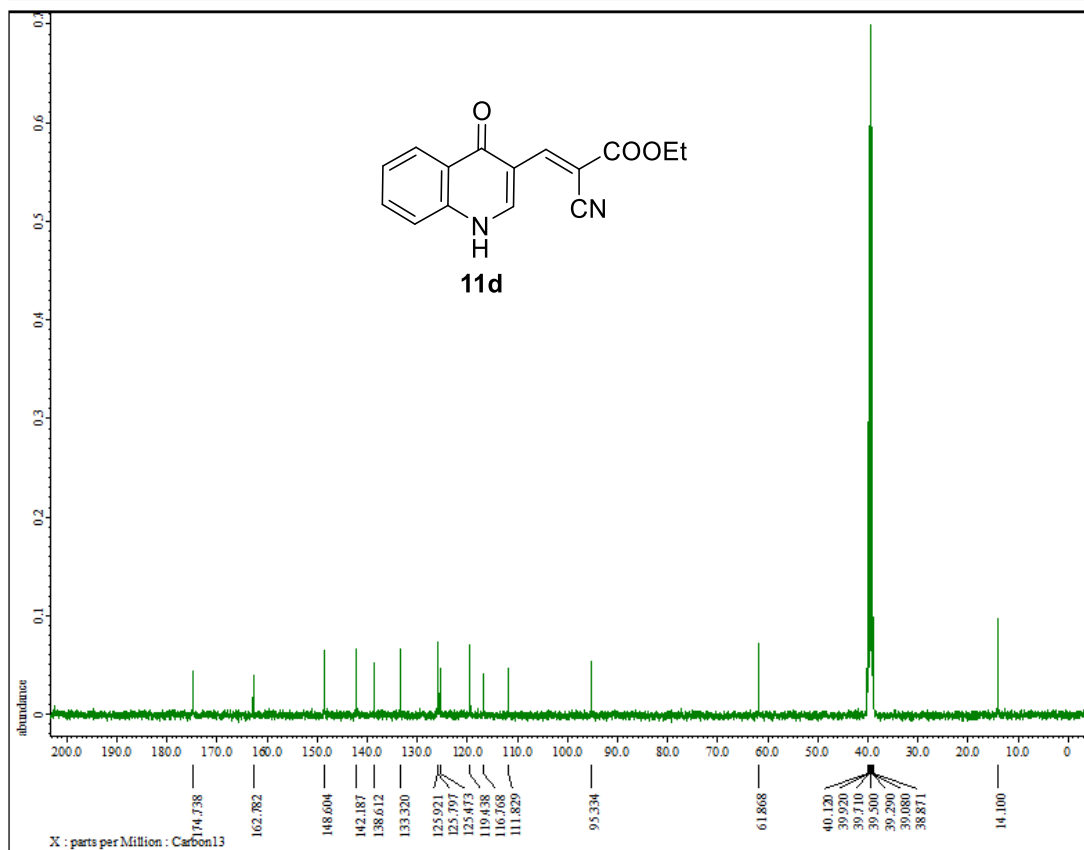



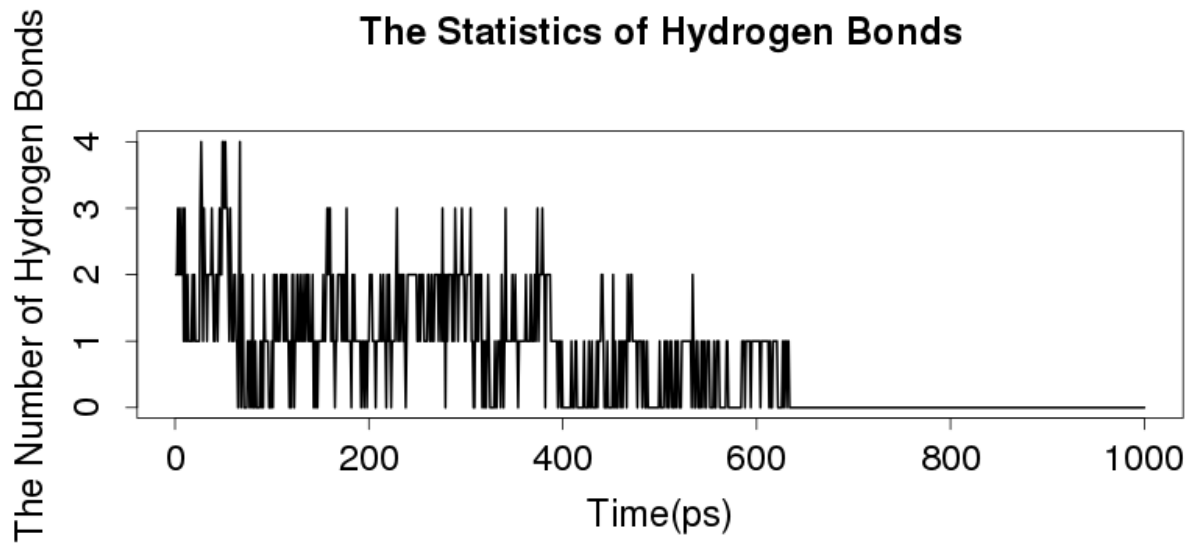

Figure: Hydrogen Bond Statistics using AMBER program
